# Supplementary material for: Genetic and functional evidence identify Carboxypeptidase Q as a regulator of inflammation in respiratory infection
Source: Research Square preprint supplement (doi:10.21203/rs.3.rs-8104260/v1), 2026-02-12
Supplement: Supplementary file 2 [file 8251a25dcd587a17caed2a85.xlsx]

## Sheet: List of supplementary tables
Supplementary Tables for genome-wide association study suggests that CPQ influences the Omicron variant COVID-19 severity
Supplementary table number	Title
Supplementary Table 1	Characteristics of the study population in the China Surgery and Anesthesia Cohort and the China Severe Trauma Cohort
Supplementary Table 2	GWAS results for the SNPs showing suggestive associations.
Supplementary Table 3	Concordance rate for each sub-threshold SNP (P-value<5×10−6) between genotypic and whole-genome sequencing(WGS) data
Supplementary Table 4	All genome-wide significant associations from previous GWAS for variants within a 500 kb region surrounding the identified LD-independent risk locus.
Supplementary Table 5	The expression quantitative trait locus (eQTL) results for GWAS signals within the identified LD-independent risk locus.
Supplementary Table 6	The protein quantitative trait locus (pQTL) results for GWAS signals within the identified LD-independent risk locus.
Supplementary Table 7	The splicing quantitative trait locus (sQTL) results for GWAS signals within the identified LD-independent risk locus.
Supplementary Table 8	Protein-altering variants(PAV) linkage results for lead SNPs within the identified LD-independent risk locus.
Supplementary Table 9	Results of similarity-based gene prioritization using Polygenic Priority Score (PoPS)
Supplementary Table 10	Co-expression modules identified in co-expression network of genes within the putative causal cell types found in lung tissues of severe COVID-19 patients
Supplementary Table 11	Enrichment results for the top 100 genes in each co-expression module
Supplementary Table 12	Enrichment results for the 20 nearest genes to CPQ within the co-expression network
Supplementary Table 13	Genes linked to ubiquitin-dependent protein catabolic processes in enriched pathways related to protein catabolism and localization
Supplementary Table 14	Variants with high regulatory potential based on the RegulomeDB ranking score
Supplementary Table 15	Variant-TF pairs with significantly increased binding affinity in the presence of the risk alleles
Supplementary Table 16	Variant-TF pairs with significantly decreased binding affinity in the presence of the risk alleles

## Sheet: Supplementary Table 1
Supplementary Table 1 Characteristics of the study population in the China Surgery and Anesthesia Cohort and the China Severe Trauma Cohort
	COVID-19 severity		Overall
	No(n=4,882)	Yes(n=269)	(N=5,151)
Age at baseline, mean (SD), years	49.6 (10.9)	51.1 (11.1)	49.7 (10.9)
Sex, No. (%)
Female	2741 (56.15%)	157 (58.36%)	2898 (56.26%)
Male	2141 (43.85%)	112 (41.64%)	2253 (43.74%)
Education, No. (%)
Middle school and lower	1407 (28.82%)	120 (44.61%)	1527 (29.64%)
High school	1939 (39.72%)	109 (40.52%)	2048 (39.76%)
Junior college	1207 (24.72%)	34 (12.64%)	1241 (24.09%)
College and above	268 (5.49%)	3 (1.12%)	271 (5.26%)
Unknown	61 (1.25%)	3 (1.12%)	64 (1.24%)
BMI, No. (%)
<18.5	212 (4.34%)	17 (6.32%)	229 (4.45%)
18.5-24.9	3308 (67.76%)	181 (67.29%)	3489 (67.73%)
25-29.9	1220 (24.99%)	62 (23.05%)	1282 (24.89%)
≥30	123 (2.52%)	9 (3.35%)	132 (2.56%)
Unknown	19 (0.39%)	0 (0%)	19 (0.37%)
Smoking status, No. (%)
Never	3857 (79.00%)	220 (81.78%)	4077 (79.15%)
Ever	760 (15.57%)	38 (14.13%)	798 (15.49%)
Current	264 (5.41%)	11 (4.09%)	275 (5.34%)
Unknown	1 (0.0%)	0 (0%)	1 (0.0%)
Drinking status, No. (%)
No	4054 (83.04%)	224 (83.27%)	4278 (83.05%)
Yes	827 (16.94%)	45 (16.73%)	872 (16.93%)
Unknown	1 (0.0%)	0 (0%)	1 (0.0%)
History of somatic diseasea, No. (%)
0	3705 (75.89%)	181 (67.29%)	3886 (75.44%)
1	901 (18.46%)	62 (23.05%)	963 (18.70%)
≥2	276 (5.65%)	26 (9.67%)	302 (5.86%)
COVID-19 vaccination, No. (%)
Yes	4146 (84.92%)	212 (78.81%)	4358 (84.60%)
No	736 (15.1%)	57 (21.2%)	793 (15.4%)
a History of somatic disease was measured by disease based on Charlson Comorbidity Index in the China Surgery and Anesthesia Cohort (CSAC), while disease of immune system, cardiovascular system, metabolic system, and nervous system in the China Severe Trauma Cohort (CSTC).

## Sheet: Supplementary Table 2
Supplementary Table 2 GWAS results for the SNPs showing suggestive associations.
CHR	SNP	POSa	A1	A2	N	AF1	BETAb	SE	P	OR (95%Confidence Interval)b
Genome-wide significant SNPs (i.e., P<5e-8)
8	rs7817424	98001694	T	C	5119	0.0704239	1.04908	0.19193	4.60423e-08	2.86 (1.96-4.16)
8	rs10111293	97950846	A	G	5134	0.0730425	1.02836	0.188223	4.66759e-08	2.80 (1.93-4.04)
Sub-threshold SNPs (i.e., P<5e-6)
8	rs10099492	97988760	A	G	5135	0.0703019	1.04486	0.191689	5.01315e-08	2.84 (1.95-4.14)
8	rs56295838	98013504	A	G	5132	0.0703429	1.0444	0.191681	5.07488e-08	2.84 (1.95-4.14)
8	rs73698822	97946415	A	G	5150	0.0717476	1.03211	0.189533	5.16523e-08	2.81 (1.94-4.07)
8	rs73698823	97946473	G	A	5150	0.0717476	1.03211	0.189533	5.16523e-08	2.81 (1.94-4.07)
8	rs11997887	97947186	A	T	5151	0.0718307	1.03026	0.189409	5.34766e-08	2.80 (1.93-4.06)
8	rs11994185	97947326	A	G	5151	0.0718307	1.03026	0.189409	5.34766e-08	2.80 (1.93-4.06)
8	rs73698825	97947968	T	G	5151	0.0718307	1.03026	0.189409	5.34766e-08	2.80 (1.93-4.06)
8	rs28463602	97950343	T	C	5151	0.0718307	1.03026	0.189409	5.34766e-08	2.80 (1.93-4.06)
8	rs80088884	97952520	A	G	5146	0.0719005	1.02939	0.189398	5.47767e-08	2.80 (1.93-4.06)
8	rs28605041	97964855	G	A	5138	0.0706501	1.03437	0.190935	6.04857e-08	2.81 (1.94-4.09)
8	rs10099706	97969204	C	T	5138	0.0706501	1.03437	0.190935	6.04857e-08	2.81 (1.94-4.09)
8	rs10099984	97962130	G	T	5137	0.0706638	1.03424	0.190933	6.06924e-08	2.81 (1.93-4.09)
8	rs10092653	97971119	T	C	5138	0.0706501	1.0338	0.190888	6.10419e-08	2.81 (1.93-4.09)
8	rs10104494	98037723	T	C	5151	0.070763	1.0307	0.190634	6.41976e-08	2.80 (1.93-4.07)
8	rs28749318	98032369	A	T	5141	0.0708033	1.03138	0.190771	6.43169e-08	2.80 (1.93-4.08)
8	rs28820108	98033882	C	A	5142	0.0708868	1.02907	0.190613	6.71158e-08	2.80 (1.93-4.07)
8	rs11984922	98024009	C	T	5120	0.0711914	1.0234	0.190499	7.77802e-08	2.78 (1.92-4.04)
8	rs11987777	98032218	C	T	5143	0.0711647	1.02042	0.190066	7.92702e-08	2.77 (1.91-4.03)
8	rs3890744	98042925	T	C	5137	0.0703718	1.02279	0.191369	9.06275e-08	2.78 (1.91-4.05)
8	rs201276270	98053124	G	A	5135	0.0703992	1.0225	0.191364	9.12961e-08	2.78 (1.91-4.05)
8	rs199649300	98054388	G	A	5133	0.0704267	1.02222	0.19136	9.19991e-08	2.78 (1.91-4.04)
8	rs10087704	97975231	T	C	5149	0.0714702	1.00989	0.189292	9.54995e-08	2.75 (1.89-3.98)
8	rs28575601	97974559	A	G	5145	0.0715258	1.0091	0.189282	9.75531e-08	2.74 (1.89-3.98)
8	rs78562693	98050282	T	C	5108	0.0665623	1.04832	0.19666	9.78882e-08	2.85 (1.94-4.19)
8	rs12547473	97987202	T	C	5114	0.0677552	1.03761	0.1947	9.85968e-08	2.82 (1.93-4.13)
8	rs11997742	97987612	C	T	5113	0.0677684	1.03743	0.194697	9.90483e-08	2.82 (1.93-4.13)
8	rs10106679	97976303	C	T	5150	0.0715534	1.00763	0.189136	9.95492e-08	2.74 (1.89-3.97)
8	rs10111129	97981002	T	C	5150	0.0715534	1.00763	0.189136	9.95492e-08	2.74 (1.89-3.97)
8	rs3802194	97981109	T	C	5150	0.0715534	1.00763	0.189136	9.95492e-08	2.74 (1.89-3.97)
8	rs10106430	97982856	C	A	5150	0.0715534	1.00763	0.189136	9.95492e-08	2.74 (1.89-3.97)
8	rs10087996	97975585	T	A	5139	0.0716093	1.00809	0.189268	1.00272e-07	2.74 (1.89-3.97)
8	rs10090663	97979470	C	T	5151	0.0716366	1.00561	0.189	1.03378e-07	2.73 (1.89-3.96)
8	rs78626826	97985241	A	C	5151	0.0716366	1.00561	0.189	1.03378e-07	2.73 (1.89-3.96)
8	rs11998498	98057214	T	C	5145	0.0705539	1.01366	0.190862	1.09051e-07	2.76 (1.90-4.01)
8	rs10955095	98047804	T	A	5138	0.0707474	1.01168	0.190649	1.11729e-07	2.75 (1.89-4.00)
8	rs73695755	98058174	G	A	5146	0.0706374	1.01107	0.190688	1.14394e-07	2.75 (1.89-3.99)
8	rs59916267	98061344	A	G	5146	0.0706374	1.01107	0.190688	1.14394e-07	2.75 (1.89-3.99)
8	rs6994621	98059403	C	T	5142	0.0706923	1.01028	0.190677	1.16835e-07	2.75 (1.89-3.99)
8	rs28509259	98068638	T	A	5142	0.0706923	1.01026	0.190679	1.16941e-07	2.75 (1.89-3.99)
8	rs73695756	98062836	C	T	5142	0.0706923	1.01025	0.190677	1.16944e-07	2.75 (1.89-3.99)
8	rs10089867	98075884	G	A	5137	0.0707611	1.00924	0.190664	1.20144e-07	2.74 (1.89-3.99)
8	rs28631213	98016920	T	A	5123	0.0721257	0.999552	0.188968	1.22622e-07	2.72 (1.88-3.94)
8	rs9297270	98066678	C	T	5140	0.0708171	1.00737	0.19052	1.24035e-07	2.74 (1.89-3.98)
8	rs9297273	98068148	T	C	5140	0.0708171	1.00737	0.19052	1.24035e-07	2.74 (1.89-3.98)
8	rs9297271	98066803	A	G	5141	0.0709006	1.00589	0.190417	1.27373e-07	2.73 (1.88-3.97)
8	rs6468525	98018834	G	A	5125	0.0721951	0.997413	0.188815	1.27438e-07	2.71 (1.87-3.93)
8	rs11990753	98081699	C	A	5140	0.0710117	1.00156	0.19015	1.38524e-07	2.72 (1.88-3.95)
8	rs28870695	98054774	G	C	5134	0.0712894	0.99851	0.189837	1.44196e-07	2.71 (1.87-3.94)
8	rs73281775	98069389	A	G	5141	0.0710951	0.998643	0.189957	1.46254e-07	2.71 (1.87-3.94)
8	rs10107707	98038083	T	C	5151	0.0724131	0.987267	0.187899	1.48624e-07	2.68 (1.86-3.88)
8	rs11993103	97946169	T	C	5147	0.071498	0.988599	0.188858	1.65329e-07	2.69 (1.86-3.89)
8	rs11984654	97985242	G	A	5140	0.0727626	0.978145	0.18736	1.78286e-07	2.66 (1.84-3.84)
8	rs10955096	98048588	T	C	5143	0.0719424	0.980219	0.188604	2.02267e-07	2.67 (1.84-3.86)
8	rs9297269	98051434	C	G	5142	0.0719564	0.980057	0.188601	2.03133e-07	2.66 (1.84-3.86)
8	rs73268709	98075642	C	T	5141	0.0719704	0.977771	0.188615	2.1724e-07	2.66 (1.84-3.85)
8	rs10086925	98075765	T	A	5141	0.0719704	0.977771	0.188615	2.1724e-07	2.66 (1.84-3.85)
8	rs60893738	98066188	C	A	5144	0.0719285	0.977489	0.188578	2.1779e-07	2.66 (1.84-3.85)
8	rs9297272	98067810	G	C	5143	0.0719424	0.97736	0.188576	2.18522e-07	2.66 (1.84-3.85)
8	rs10102611	97945163	G	T	5140	0.0708171	0.982742	0.189632	2.19088e-07	2.67 (1.84-3.87)
8	rs7817021	98001510	T	A	5059	0.073137	0.969765	0.187896	2.45403e-07	2.64 (1.82-3.81)
8	rs7827661	97996589	A	G	5064	0.0731635	0.968599	0.187772	2.4909e-07	2.63 (1.82-3.81)
8	rs73696604	97999420	C	T	5060	0.0732213	0.967797	0.187761	2.54417e-07	2.63 (1.82-3.80)
8	rs12543489	98066271	A	C	5146	0.072192	0.969174	0.188031	2.54548e-07	2.64 (1.82-3.81)
8	rs7011934	98059046	C	A	5151	0.072219	0.968474	0.187934	2.55975e-07	2.63 (1.82-3.81)
8	rs10112408	97944560	A	G	5133	0.0701344	0.971926	0.190085	3.16886e-07	2.64 (1.82-3.84)
8	rs79492378	98025855	G	A	4986	0.0465303	1.20608	0.23617	3.27645e-07	3.34 (2.10-5.31)
8	rs73698818	97943932	C	T	5120	0.0689453	0.978649	0.191772	3.33986e-07	2.66 (1.83-3.87)
8	rs73698820	97943974	C	T	5121	0.0690295	0.976873	0.191649	3.44739e-07	2.66 (1.82-3.87)
8	rs13439555	98092926	T	G	5129	0.0706765	0.958979	0.189607	4.24293e-07	2.61 (1.80-3.78)
8	rs72664567	98097624	C	A	5121	0.0708846	0.955954	0.189477	4.52983e-07	2.60 (1.79-3.77)
8	rs11998215	98096903	A	G	5130	0.0709552	0.952706	0.189165	4.74466e-07	2.59 (1.79-3.76)
8	rs10955098	98090582	A	G	5131	0.0709413	0.952498	0.189141	4.75595e-07	2.59 (1.79-3.76)
8	rs13439480	98092537	A	G	5131	0.0709413	0.952498	0.189141	4.75595e-07	2.59 (1.79-3.76)
8	rs12547253	98087338	G	C	5134	0.0709973	0.950818	0.189006	4.88907e-07	2.59 (1.79-3.75)
8	rs113960715	98097533	G	T	5123	0.0710521	0.950348	0.189096	5.01466e-07	2.59 (1.79-3.75)
8	rs10107928	97943311	G	A	5116	0.0689015	0.952923	0.191206	6.23648e-07	2.59 (1.78-3.77)
8	rs10955100	98103396	G	C	5081	0.0691793	0.951498	0.192149	7.35012e-07	2.59 (1.78-3.77)
8	rs13438930	98092712	C	A	5125	0.0719024	0.929195	0.187672	7.37682e-07	2.53 (1.75-3.66)
8	rs58193071	97941737	G	A	5096	0.0682889	0.947225	0.192199	8.29252e-07	2.58 (1.77-3.76)
8	rs10108385	97943598	T	C	5119	0.0696425	0.93199	0.189761	9.04313e-07	2.54 (1.75-3.68)
8	rs61601235	97941731	C	T	5098	0.0685563	0.94145	0.191797	9.17409e-07	2.56 (1.76-3.73)
8	rs28551023	97942296	G	A	5103	0.0685871	0.940053	0.191648	9.33797e-07	2.56 (1.76-3.73)
8	rs28398259	97940555	G	A	5073	0.06712	0.950379	0.193784	9.37534e-07	2.59 (1.77-3.78)
8	rs10108013	97943245	A	C	5109	0.0686044	0.938909	0.191509	9.45385e-07	2.56 (1.76-3.72)
8	rs10094858	97943230	C	T	5107	0.0686313	0.938595	0.191504	9.52673e-07	2.56 (1.76-3.72)
8	rs28408038	98101633	G	A	5095	0.0697743	0.932472	0.190473	9.80216e-07	2.54 (1.75-3.69)
8	rs10955101	98106093	G	T	5062	0.0692414	0.926126	0.191714	1.36004e-06	2.52 (1.73-3.68)
8	rs10098932	98106445	G	A	5062	0.0692414	0.926126	0.191714	1.36004e-06	2.52 (1.73-3.68)
8	rs73698817	97942072	G	A	5095	0.0680078	0.925786	0.191885	1.40222e-06	2.52 (1.73-3.68)
8	rs10107937	97943323	G	A	5114	0.0694173	0.915326	0.189864	1.42869e-06	2.50 (1.72-3.62)
8	rs9297274	98068337	T	C	4838	0.0347251	1.35234	0.280634	1.44377e-06	3.87 (2.23-6.70)
8	rs28493764	97941326	T	C	5087	0.0681148	0.924281	0.191856	1.45312e-06	2.52 (1.73-3.67)
8	rs28395300	97941225	G	A	5086	0.0681282	0.924087	0.191853	1.45998e-06	2.52 (1.73-3.67)
8	rs11992953	98104633	G	A	5064	0.0694115	0.920535	0.191341	1.50203e-06	2.51 (1.73-3.65)
8	rs28442008	97939345	T	A	5062	0.0672659	0.926483	0.193227	1.6285e-06	2.53 (1.73-3.69)
8	rs12114789	98109273	G	T	5049	0.0686275	0.924165	0.192959	1.67248e-06	2.52 (1.73-3.68)
8	rs12114373	98107450	A	G	5059	0.0686895	0.912928	0.191956	1.97539e-06	2.49 (1.71-3.63)
8	rs57511341	97930927	G	C	5037	0.0672027	0.912576	0.193313	2.35004e-06	2.49 (1.71-3.64)
8	rs11991504	97930438	C	T	5036	0.067216	0.912305	0.193309	2.36527e-06	2.49 (1.70-3.64)
8	rs11991731	97927243	T	A	5033	0.0672561	0.911844	0.193301	2.39077e-06	2.49 (1.70-3.64)
8	rs73279838	97924666	C	T	5029	0.0673096	0.9111	0.193289	2.43293e-06	2.49 (1.70-3.63)
12	rs56252211	97497559	T	A	5078	0.150256	0.611677	0.130001	2.53654e-06	1.84 (1.43-2.38)
12	rs10860153	97541532	G	A	4941	0.230318	0.522147	0.111055	2.58021e-06	1.69 (1.36-2.10)
8	rs10955102	98112631	G	A	5005	0.0642358	0.931863	0.198857	2.78464e-06	2.54 (1.72-3.75)
13	rs1331938	84280698	C	T	4873	0.413503	-0.437948	0.0944858	3.56821e-06	0.65 (0.54-0.78)
12	rs61941715	97535956	A	G	5142	0.152956	0.590621	0.127992	3.94024e-06	1.81 (1.40-2.32)
12	rs55980819	97534262	G	A	5134	0.153	0.590818	0.128058	3.95618e-06	1.81 (1.40-2.32)
12	rs1468894	97534340	G	A	5134	0.153	0.590818	0.128058	3.95618e-06	1.81 (1.40-2.32)
12	rs61941713	97535950	A	T	5141	0.152986	0.590472	0.127992	3.96217e-06	1.80 (1.40-2.32)
12	rs61941714	97535954	A	G	5141	0.152986	0.590472	0.127992	3.96217e-06	1.80 (1.40-2.32)
12	rs61941716	97536978	C	A	5143	0.153024	0.589989	0.127959	4.01226e-06	1.80 (1.40-2.32)
12	rs61941712	97533492	T	C	5134	0.153097	0.590267	0.128038	4.02508e-06	1.80 (1.40-2.32)
8	rs7016022	68904277	T	C	5147	0.412473	0.42057	0.091582	4.3844e-06	1.52 (1.27-1.82)
12	rs12321516	97548018	C	T	5140	0.157393	0.584375	0.127252	4.38474e-06	1.79 (1.40-2.30)
8	rs62522409	68886648	A	C	5147	0.41121	0.420775	0.0916799	4.44073e-06	1.52 (1.27-1.82)
11	rs1786707	96031872	A	T	5073	0.320323	0.438814	0.0956196	4.45033e-06	1.55 (1.29-1.87)
12	rs11108853	97550300	G	T	5145	0.157434	0.583015	0.127115	4.50675e-06	1.79 (1.40-2.30)
12	rs61941671	97496089	C	T	5066	0.14923	0.597081	0.130188	4.51159e-06	1.82 (1.41-2.34)
11	rs1783830	96031870	A	T	5078	0.320303	0.438066	0.0955476	4.54439e-06	1.55 (1.29-1.87)
12	rs4762367	97551024	T	C	5146	0.157501	0.5822	0.127074	4.61447e-06	1.79 (1.40-2.30)
12	rs146714063	97498661	A	G	5096	0.151491	0.590568	0.128905	4.61812e-06	1.81 (1.40-2.32)
GWAS:genome-wide association studies; SNP: single-nucleotide polymorphism; CHR: chromosome; POS: base position; A1: effect allele; A2: reference allele; SE: standar erro.OR: odds ratio.
a Genomic positions are based on human genome assembly hg19.
b Beta and ORs were derived from a generalized linear mixed model implemented in GCTA, adjusting age, sex, birth year, genotyping batch, cohort, and the first ten principal components.

## Sheet: Supplementary Table 3
Supplementary Table 3 Concordance rate for each sub-threshold SNP (P-value<5×10−6) between genotypic and whole-genome sequencing(WGS) data
GWAS summary statistics							Concordance between WGS and genotyping array among individuals with different genotypes
CHR	SNP	POSa	Reference allele	Effect allele	BETA	P	Homozygous reference (No. consistent/No. total)	Homozygous effect (No. consistent/No. total)	Heterozygous (No. consistent/No. total)	Overall concordance rate for the SNP
8	rs10504967	97873306	A	T	0.828638	4.90954e-05	429/439	-/-	45/59	0.9518
8	rs28628406	97900442	A	G	0.816586	3.24597e-05	431/439	-/-	49/59	0.9639
8	rs73279838	97924666	C	T	0.9111	2.43293e-06	432/439	2/2	53/57	0.9779
8	rs11991731	97927243	T	A	0.911844	2.39077e-06	432/437	2/2	55/59	0.9819
8	rs11991504	97930438	C	T	0.912305	2.36527e-06	432/437	2/2	55/59	0.9819
8	rs57511341	97930927	G	C	0.912576	2.35004e-06	432/437	2/2	55/59	0.9819
8	rs28442008	97939345	T	A	0.926483	1.6285e-06	434/438	2/2	54/58	0.9839
8	rs28398259	97940555	G	A	0.950379	9.37534e-07	435/438	2/2	54/58	0.9859
8	rs28395300	97941225	G	A	0.924087	1.45998e-06	435/438	2/2	54/58	0.9859
8	rs28493764	97941326	T	C	0.924281	1.45312e-06	435/438	2/2	54/58	0.9859
8	rs61601235	97941731	C	T	0.94145	9.17409e-07	435/438	2/2	54/58	0.9859
8	rs58193071	97941737	G	A	0.947225	8.29252e-07	435/438	2/2	54/58	0.9859
8	rs10094858	97943230	C	T	0.938595	9.52673e-07	435/438	2/2	54/58	0.9859
8	rs10108013	97943245	A	C	0.938909	9.45385e-07	435/438	2/2	54/58	0.9859
8	rs10107928	97943311	G	A	0.952923	6.23648e-07	436/438	2/2	54/58	0.988
8	rs10107937	97943323	G	A	0.915326	1.42869e-06	435/437	2/2	55/59	0.988
8	rs10108385	97943598	T	C	0.93199	9.04313e-07	435/437	2/2	55/59	0.988
8	rs73698818	97943932	C	T	0.978649	3.33986e-07	436/438	2/2	54/58	0.988
8	rs73698820	97943974	C	T	0.976873	3.44739e-07	436/438	2/2	54/58	0.988
8	rs10112408	97944560	A	G	0.971926	3.16886e-07	436/438	2/2	55/58	0.99
8	rs10102611	97945163	G	T	0.982742	2.19088e-07	436/438	2/2	55/58	0.99
8	rs73698822	97946415	A	G	1.03211	5.16523e-08	436/438	2/2	56/58	0.992
8	rs73698823	97946473	G	A	1.03211	5.16523e-08	436/438	2/2	56/58	0.992
8	rs11997887	97947186	A	T	1.03026	5.34766e-08	437/438	2/2	57/58	0.996
8	rs11994185	97947326	A	G	1.03026	5.34766e-08	437/438	2/2	57/58	0.996
8	rs73698825	97947968	T	G	1.03026	5.34766e-08	437/439	2/2	56/57	0.994
8	rs28463602	97950343	T	C	1.03026	5.34766e-08	437/438	2/2	57/58	0.996
8	rs10111293	97950846	A	G	1.02836	4.66759e-08	433/436	2/2	58/60	0.99
8	rs80088884	97952520	A	G	1.02939	5.47767e-08	436/437	2/2	57/59	0.994
8	rs10099984	97962130	G	T	1.03424	6.06924e-08	439/440	2/2	54/56	0.994
8	rs28605041	97964855	G	A	1.03437	6.04857e-08	439/440	2/2	54/56	0.994
8	rs10099706	97969204	C	T	1.03437	6.04857e-08	439/440	2/2	54/56	0.994
8	rs10092653	97971119	T	C	1.0338	6.10419e-08	439/440	2/2	54/56	0.994
8	rs28575601	97974559	A	G	1.0091	9.75531e-08	439/440	2/2	55/56	0.996
8	rs10087704	97975231	T	C	1.00989	9.54995e-08	439/440	2/2	55/56	0.996
8	rs10087996	97975585	T	A	1.00809	1.00272e-07	439/440	2/2	55/56	0.996
8	rs10106679	97976303	C	T	1.00763	9.95492e-08	439/440	2/2	55/56	0.996
8	rs10090663	97979470	C	T	1.00561	1.03378e-07	439/440	2/2	55/56	0.996
8	rs10111129	97981002	T	C	1.00763	9.95492e-08	439/440	2/2	55/56	0.996
8	rs3802194	97981109	T	C	1.00763	9.95492e-08	439/440	2/2	55/56	0.996
8	rs10106430	97982856	C	A	1.00763	9.95492e-08	439/440	2/2	55/56	0.996
8	rs78626826	97985241	A	C	1.00561	1.03378e-07	439/440	2/2	55/56	0.996
8	rs11984654	97985242	G	A	0.978145	1.78286e-07	437/439	2/2	56/57	0.994
8	rs12547473	97987202	T	C	1.03761	9.85968e-08	439/440	1/2	55/56	0.994
8	rs11997742	97987612	C	T	1.03743	9.90483e-08	439/440	1/2	55/56	0.994
8	rs10099492	97988760	A	G	1.04486	5.01315e-08	439/440	1/2	55/56	0.994
8	rs7827661	97996589	A	G	0.968599	2.4909e-07	427/434	1/2	55/62	0.9699
8	rs73696604	97999420	C	T	0.967797	2.54417e-07	427/434	1/2	55/62	0.9699
8	rs7817021	98001510	T	A	0.969765	2.45403e-07	427/434	1/2	55/62	0.9699
8	rs56295838	98013504	A	G	1.0444	5.07488e-08	439/440	1/2	55/56	0.994
8	rs28631213	98016920	T	A	0.999552	1.22622e-07	433/439	1/2	56/57	0.9839
8	rs6468525	98018834	G	A	0.997413	1.27438e-07	432/433	1/1	57/64	0.9839
8	rs11984922	98024009	C	T	1.0234	7.77802e-08	432/438	1/1	58/59	0.9859
8	rs79492378	98025855	G	A	1.20608	3.27645e-07	444/450	1/1	37/47	0.9679
8	rs11987777	98032218	C	T	1.02042	7.92702e-08	437/438	1/1	58/59	0.996
8	rs28749318	98032369	A	T	1.03138	6.43169e-08	437/438	1/1	58/59	0.996
8	rs28820108	98033882	C	A	1.02907	6.71158e-08	437/438	1/1	58/59	0.996
8	rs10104494	98037723	T	C	1.0307	6.41976e-08	437/438	1/1	58/59	0.996
8	rs10107707	98038083	T	C	0.987267	1.48624e-07	436/437	1/1	59/60	0.996
8	rs3890744	98042925	T	C	1.02279	9.06275e-08	437/439	1/1	57/58	0.994
8	rs10955095	98047804	T	A	1.01168	1.11729e-07	437/439	1/1	57/58	0.994
8	rs10955096	98048588	T	C	0.980219	2.02267e-07	436/438	1/1	58/59	0.994
8	rs78562693	98050282	T	C	1.04832	9.78882e-08	437/439	1/1	55/58	0.99
8	rs9297269	98051434	C	G	0.980057	2.03133e-07	436/438	1/1	58/59	0.994
8	rs201276270	98053124	G	A	1.0225	9.12961e-08	437/439	1/1	57/58	0.994
8	rs199649300	98054388	G	A	1.02222	9.19991e-08	437/439	-/-	57/59	0.992
8	rs28870695	98054774	G	C	0.99851	1.44196e-07	436/438	1/1	58/59	0.994
8	rs11998498	98057214	T	C	1.01366	1.09051e-07	438/439	1/1	57/58	0.996
8	rs73695755	98058174	G	A	1.01107	1.14394e-07	438/439	1/1	57/58	0.996
8	rs7011934	98059046	C	A	0.968474	2.55975e-07	437/438	1/1	58/59	0.996
8	rs6994621	98059403	C	T	1.01028	1.16835e-07	438/439	1/1	57/58	0.996
8	rs59916267	98061344	A	G	1.01107	1.14394e-07	438/439	1/1	57/58	0.996
8	rs73695756	98062836	C	T	1.01025	1.16944e-07	438/439	1/1	57/58	0.996
8	rs60893738	98066188	C	A	0.977489	2.1779e-07	436/438	1/1	58/59	0.994
8	rs12543489	98066271	A	C	0.969174	2.54548e-07	436/438	1/1	58/59	0.994
8	rs9297270	98066678	C	T	1.00737	1.24035e-07	437/439	1/1	57/58	0.994
8	rs9297271	98066803	A	G	1.00589	1.27373e-07	437/439	1/1	57/58	0.994
8	rs9297272	98067810	G	C	0.97736	2.18522e-07	436/438	1/1	58/59	0.994
8	rs28509259	98068638	T	A	1.01026	1.16941e-07	437/439	1/1	57/58	0.994
8	rs73281775	98069389	A	G	0.998643	1.46254e-07	437/439	1/1	57/58	0.994
8	rs73268709	98075642	C	T	0.977771	2.1724e-07	436/438	1/1	58/59	0.994
8	rs10089867	98075884	G	A	1.00924	1.20144e-07	437/439	1/1	57/58	0.994
8	rs12547253	98087338	G	C	0.950818	4.88907e-07	437/439	1/1	57/58	0.994
8	rs10955098	98090582	A	G	0.952498	4.75595e-07	437/439	1/1	57/58	0.994
8	rs13438930	98092712	C	A	0.929195	7.37682e-07	435/438	1/1	58/59	0.992
8	rs13439555	98092926	T	G	0.958979	4.24293e-07	437/439	1/1	57/58	0.994
8	rs11998215	98096903	A	G	0.952706	4.74466e-07	437/439	1/1	56/58	0.992
8	rs113960715	98097533	G	T	0.950348	5.01466e-07	436/439	1/1	56/58	0.99
8	rs72664567	98097624	C	A	0.955954	4.52983e-07	436/439	1/1	56/58	0.99
8	rs28408038	98101633	G	A	0.932472	9.80216e-07	436/439	1/1	55/58	0.988
8	rs10955100	98103396	G	C	0.951498	7.35012e-07	436/439	1/1	54/58	0.9859
8	rs11992953	98104633	G	A	0.920535	1.50203e-06	435/438	1/1	55/59	0.9859
8	rs10955101	98106093	G	T	0.926126	1.36004e-06	435/438	1/1	55/59	0.9859
8	rs10098932	98106445	G	A	0.926126	1.36004e-06	435/438	1/1	55/59	0.9859
8	rs12114373	98107450	A	G	0.912928	1.97539e-06	435/438	1/1	55/59	0.9859
8	rs12114789	98109273	G	T	0.924165	1.67248e-06	434/437	1/1	54/60	0.9819
8	rs10955102	98112631	G	A	0.931863	2.78464e-06	435/440	1/1	52/57	0.9799
8	rs12334323	98128054	G	C	0.894613	1.37504e-05	432/440	1/1	46/57	0.9618
8	rs7844514	98130180	T	C	0.92682	8.19271e-06	433/441	1/1	43/56	0.9578
GWAS:genome-wide association studies; SNP: single-nucleotide polymorphism; CHR: chromosome; POS: base position; No.:Number; -/-: No individuals with the genotype
a Genomic positions are based on human genome assembly hg19.

## Sheet: Supplementary Table 4
Supplementary Table 4 All genome-wide significant associations from previous GWAS for variants within a 500 kb region surrounding the identified LD-independent risk locus.
LD-independent risk locusa (chromosome:start to end)	PMID	Study accession in GWAS Catalog database	Disease or trait	First author	Journal of publish	Study title	Mapped trait	Initial sample size	Replication sample size	Region	CHR	POSb	Strongest SNP-risk allele	SNPS	P-value
8-97924666-98130180	39528825	GCST90427798	Carboxypeptidase Q levels	Western D	Nat Genet	Proteogenomic analysis of human cerebrospinal fluid identifies neurologically relevant regulation and implicates causal proteins for Alzheimer's disease.	protein measurement	3,506 European ancestry individuals		8q22.1	8	97029409	rs148684432-A	rs148684432	8e-28
8-97924666-98130180	39406924	GCST90455672	Gout	Major TJ	Nat Genet	A genome-wide association analysis reveals new pathogenic pathways in gout.	gout	1,044 African American or Afro-Caribbean cases, 46,556 African American or Afro-Caribbean controls		8q22.1	8	96338890	rs73263774-A	rs73263774	4e-08
8-97924666-98130180	39024449	GCST90479671	mean corpuscular hemoglobin concentration (MCHC, minimum, inv-norm transformed)	Verma A	Science	Diversity and scale: Genetic architecture of 2068 traits in the VA Million Veteran Program.	mean corpuscular hemoglobin concentration	114,841 African American or Afro-Caribbean individuals, 55,798 Hispanic or Latin American individuals, 5,943 East Asian ancestry individuals, 407,301 European ancestry individuals		8q22.1	8	97679242	rs2438224-A	rs2438224	7e-18
8-97924666-98130180	39024449	GCST90479669	mean corpuscular hemoglobin concentration (MCHC, maximum, inv-norm transformed)	Verma A	Science	Diversity and scale: Genetic architecture of 2068 traits in the VA Million Veteran Program.	mean corpuscular hemoglobin concentration	114,857 African American or Afro-Caribbean individuals, 55,793 Hispanic or Latin American individuals, 5,943 East Asian ancestry individuals, 407,343 European ancestry individuals		8q22.1	8	97677321	rs36109038-G	rs36109038	2e-23
8-97924666-98130180	39024449	GCST90479673	mean corpuscular hemoglobin (MCH, mean, inv-norm transformed)	Verma A	Science	Diversity and scale: Genetic architecture of 2068 traits in the VA Million Veteran Program.	mean corpuscular hemoglobin concentration	114,855 African American or Afro-Caribbean individuals, 55,792 Hispanic or Latin American individuals, 5,944 East Asian ancestry individuals, 407,342 European ancestry individuals		8q22.1	8	97654587	rs2438207-G	rs2438207	5e-16
8-97924666-98130180	39024449	GCST90476361	red cell diameter width (RDW, mean, inv-norm transformed)	Verma A	Science	Diversity and scale: Genetic architecture of 2068 traits in the VA Million Veteran Program.	Red cell distribution width	380,796 European ancestry individuals		8q22.1	8	97652425	rs2468024-G	rs2468024	3e-25
8-97924666-98130180	39024449	GCST90476365	red cell diameter width (RDW, minimum, inv-norm transformed)	Verma A	Science	Diversity and scale: Genetic architecture of 2068 traits in the VA Million Veteran Program.	Red cell distribution width	380,819 European ancestry individuals		8q22.1	8	97652425	rs2468024-G	rs2468024	4e-35
8-97924666-98130180	39024449	GCST90479670	mean corpuscular hemoglobin concentration (MCHC, mean, inv-norm transformed)	Verma A	Science	Diversity and scale: Genetic architecture of 2068 traits in the VA Million Veteran Program.	mean corpuscular hemoglobin concentration	114,851 African American or Afro-Caribbean individuals, 55,797 Hispanic or Latin American individuals, 5,942 East Asian ancestry individuals, 407,345 European ancestry individuals		8q22.1	8	97679242	rs2438224-A	rs2438224	3e-25
8-97924666-98130180	39024449	GCST90479672	mean corpuscular hemoglobin (MCH, maximum, inv-norm transformed)	Verma A	Science	Diversity and scale: Genetic architecture of 2068 traits in the VA Million Veteran Program.	mean corpuscular hemoglobin concentration	114,852 African American or Afro-Caribbean individuals, 55,783 Hispanic or Latin American individuals, 5,942 East Asian ancestry individuals, 407,288 European ancestry individuals		8q22.1	8	97654587	rs2438207-G	rs2438207	7e-15
8-97924666-98130180	39024449	GCST90479674	mean corpuscular hemoglobin (MCH, minimum, inv-norm transformed)	Verma A	Science	Diversity and scale: Genetic architecture of 2068 traits in the VA Million Veteran Program.	mean corpuscular hemoglobin concentration	114,836 African American or Afro-Caribbean individuals, 55,792 Hispanic or Latin American individuals, 5,944 East Asian ancestry individuals, 407,317 European ancestry individuals		8q22.1	8	97654587	rs2438207-G	rs2438207	3e-14
8-97924666-98130180	39024449	GCST90476357	red cell diameter width (RDW, maximum, inv-norm transformed)	Verma A	Science	Diversity and scale: Genetic architecture of 2068 traits in the VA Million Veteran Program.	Red cell distribution width	380,351 European ancestry individuals		8q22.1	8	97652425	rs2468024-G	rs2468024	3e-14
8-97924666-98130180	39024449	GCST90480673	red cell diameter width (RDW, minimum, inv-norm transformed)	Verma A	Science	Diversity and scale: Genetic architecture of 2068 traits in the VA Million Veteran Program.	Red cell distribution width	110,610 African American or Afro-Caribbean individuals, 51,949 Hispanic or Latin American individuals, 5,548 East Asian ancestry individuals, 380,819 European ancestry individuals		8q22.1	8	97652425	rs2468024-G	rs2468024	3e-23
8-97924666-98130180	39024449	GCST90480671	red cell diameter width (RDW, maximum, inv-norm transformed)	Verma A	Science	Diversity and scale: Genetic architecture of 2068 traits in the VA Million Veteran Program.	Red cell distribution width	110,467 African American or Afro-Caribbean individuals, 51,877 Hispanic or Latin American individuals, 5,548 East Asian ancestry individuals, 380,351 European ancestry individuals		8q22.1	8	97652425	rs2468024-G	rs2468024	1e-12
8-97924666-98130180	39024449	GCST90480672	red cell diameter width (RDW, mean, inv-norm transformed)	Verma A	Science	Diversity and scale: Genetic architecture of 2068 traits in the VA Million Veteran Program.	Red cell distribution width	110,558 African American or Afro-Caribbean individuals, 51,938 Hispanic or Latin American individuals, 5,549 East Asian ancestry individuals, 380,796 European ancestry individuals		8q22.1	8	97652425	rs2468024-G	rs2468024	4e-17
8-97924666-98130180	39024449	GCST90475462	mean corpuscular hemoglobin concentration (MCHC, minimum, inv-norm transformed)	Verma A	Science	Diversity and scale: Genetic architecture of 2068 traits in the VA Million Veteran Program.	mean corpuscular hemoglobin concentration	407,301 European ancestry individuals		8q22.1	8	97654587	rs2438207-G	rs2438207	4e-22
8-97924666-98130180	39024449	GCST90475454	mean corpuscular hemoglobin concentration (MCHC, maximum, inv-norm transformed)	Verma A	Science	Diversity and scale: Genetic architecture of 2068 traits in the VA Million Veteran Program.	mean corpuscular hemoglobin concentration	407,343 European ancestry individuals		8q22.1	8	97654587	rs2438207-G	rs2438207	1e-33
8-97924666-98130180	39024449	GCST90475450	mean corpuscular hemoglobin (MCH, minimum, inv-norm transformed)	Verma A	Science	Diversity and scale: Genetic architecture of 2068 traits in the VA Million Veteran Program.	mean corpuscular hemoglobin concentration	407,317 European ancestry individuals		8q22.1	8	97654587	rs2438207-G	rs2438207	8e-27
8-97924666-98130180	39024449	GCST90475455	mean corpuscular hemoglobin concentration (MCHC, mean, inv-norm transformed)	Verma A	Science	Diversity and scale: Genetic architecture of 2068 traits in the VA Million Veteran Program.	mean corpuscular hemoglobin concentration	55,797 Hispanic or Latin American individuals		8q22.1	8	97654587	rs2438207-G	rs2438207	2e-11
8-97924666-98130180	39024449	GCST90475458	mean corpuscular hemoglobin concentration (MCHC, mean, inv-norm transformed)	Verma A	Science	Diversity and scale: Genetic architecture of 2068 traits in the VA Million Veteran Program.	mean corpuscular hemoglobin concentration	407,345 European ancestry individuals		8q22.1	8	97654587	rs2438207-G	rs2438207	3e-37
8-97924666-98130180	39024449	GCST90480230	Iatrogenic hypotension (PheCode 458.2)	Verma A	Science	Diversity and scale: Genetic architecture of 2068 traits in the VA Million Veteran Program.	hypotension	584 African American or Afro-Caribbean cases, 119,371 African American or Afro-Caribbean controls, 2,029 European ancestry cases, 440,592 European ancestry controls, 206 Hispanic or Latin American cases, 58,865 Hispanic or Latin American controls		8q22.1	8	96501995	rs529028826-G	rs529028826	8e-14
8-97924666-98130180	38965376	GCST90309355	Body size (confirmatory factor analysis Factor 21)	Carey CE	Nat Hum Behav	Principled distillation of UK Biobank phenotype data reveals underlying structure in human variation.	size	329,172 European ancestry individuals		8q22.1	8	96388359	rs528100022-?	rs528100022	8e-10
8-97924666-98130180	38565336	GCST90429151	Attention deficit hyperactivity disorder or risk-taking behavior (pleiotropy)	Chen Y	J Affect Disord	Investigating the shared genetic architecture between attention-deficit/hyperactivity disorder and risk taking behavior: A large-scale genomewide cross-trait analysis.	attention deficit hyperactivity disorder, risk-taking behaviour	38,691 European ancestry ADHD cases, 225,534 European ancestry controls, 466,571 European ancestry individuals with risk-taking behavior measurements		8q22.1	8	96790354	rs12678667-?	rs12678667	6e-09
8-97924666-98130180	38182794	GCST90328132	Basal cell carcinoma	Choquet H	Commun Biol	Multi-ancestry genome-wide meta-analysis identifies novel basal cell carcinoma loci and shared genetic effects with squamous cell carcinoma.	basal cell carcinoma	49,905 European ancestry cases, 752,392 European ancestry controls		8q22.1	8	97354773	rs7833199-C	rs7833199	4e-08
8-97924666-98130180	38182794	GCST90328134	Basal cell carcinoma	Choquet H	Commun Biol	Multi-ancestry genome-wide meta-analysis identifies novel basal cell carcinoma loci and shared genetic effects with squamous cell carcinoma.	basal cell carcinoma	49,905 European ancestry cases, 752,392 European ancestry controls, 626 Hispanic or Latin American cases, 9,842 Hispanic or Latin American controls		8q22.1	8	97354773	rs7833199-C	rs7833199	2e-08
8-97924666-98130180	37500982	GCST90321120	Bone mineral density mean	He D	Osteoporos Int	A longitudinal genome-wide association study of bone mineral density mean and variability in the UK Biobank.		5,862 South Asian ancestry individuals		8q22.1	8	97578281	rs112855018-?	rs112855018	1e-300
8-97924666-98130180	37500982	GCST90321120	Bone mineral density mean	He D	Osteoporos Int	A longitudinal genome-wide association study of bone mineral density mean and variability in the UK Biobank.		5,862 South Asian ancestry individuals		8q22.1	8	97322609	rs55721933-?	rs55721933	1e-41
8-97924666-98130180	37069358	GCST90244098	Chronic obstructive pulmonary disease liability (machine learning-based score)	Cosentino J	Nat Genet	Inference of chronic obstructive pulmonary disease with deep learning on raw spirograms identifies new genetic loci and improves risk models.	chronic obstructive pulmonary disease	325,027 European ancestry individuals		8q22.1	8	96507448	rs2437780-T	rs2437780	5e-11
8-97924666-98130180	37019578	GCST90267385	Ascending aorta distensibility	Pirruccello JP	J Am Coll Cardiol	The Genetic Determinants of Aortic??Distention.	aortic measurement	32,639 European or unknown ancestry individuals		8q22.1	8	96909823	rs56252425-G	rs56252425	3e-08
8-97924666-98130180	36914875	GCST90244094	Lung function (FEV1/FVC)	Shrine N	Nat Genet	Multi-ancestry genome-wide association analyses improve resolution of genes and pathways influencing lung function and chronic obstructive pulmonary disease risk.	FEV/FVC ratio	475,645 European ancestry individuals, 8,590 African ancestry individuals, 85,279 East Asian ancestry individuals, 4,270 South Asian ancestry individuals, 14,668 Hispanic or Latin American individuals		8q22.1	8	96490232	rs2439514-C	rs2439514	7e-14
8-97924666-98130180	36477530	GCST90243985	Smoking initiation	Saunders GRB	Nature	Genetic diversity fuels gene discovery for tobacco and alcohol use.	smoking initiation	3,382,012 European ancestry, East Asian ancestry, Hispanic or Latin American, African ancestry individuals		8q22.1	8	96353691	rs11997526-A	rs11997526	5e-15
8-97924666-98130180	36477530	GCST90243985	Smoking initiation	Saunders GRB	Nature	Genetic diversity fuels gene discovery for tobacco and alcohol use.	smoking initiation	3,382,012 European ancestry, East Asian ancestry, Hispanic or Latin American, African ancestry individuals		8q22.1	8	96374613	rs2244711-T	rs2244711	2e-12
8-97924666-98130180	36477530	GCST90243968	Smoking initiation	Saunders GRB	Nature	Genetic diversity fuels gene discovery for tobacco and alcohol use.	smoking initiation	2,669,029 European ancestry individuals		8q22.1	8	96314238	rs7839347-T	rs7839347	3e-13
8-97924666-98130180	36224396	GCST90245848	Height	Yengo L	Nature	A saturated map of common genetic variants associated with human height.		5,314,291 European ancestry, Hispanic or Latin American, East Asian ancestry, African ancestry, South Asian ancestry individuals		8q22.1	8	96504756	rs2582814-C	rs2582814	3e-16
8-97924666-98130180	36224396	GCST90245848	Height	Yengo L	Nature	A saturated map of common genetic variants associated with human height.		5,314,291 European ancestry, Hispanic or Latin American, East Asian ancestry, African ancestry, South Asian ancestry individuals		8q22.1	8	96598665	rs2582801-G	rs2582801	3e-18
8-97924666-98130180	36224396	GCST90245848	Height	Yengo L	Nature	A saturated map of common genetic variants associated with human height.		5,314,291 European ancestry, Hispanic or Latin American, East Asian ancestry, African ancestry, South Asian ancestry individuals		8q22.1	8	97069186	rs2513349-G	rs2513349	8e-10
8-97924666-98130180	36224396	GCST90245848	Height	Yengo L	Nature	A saturated map of common genetic variants associated with human height.		5,314,291 European ancestry, Hispanic or Latin American, East Asian ancestry, African ancestry, South Asian ancestry individuals		8q22.1	8	97272509	rs2583503-T	rs2583503	3e-12
8-97924666-98130180	36224396	GCST90245848	Height	Yengo L	Nature	A saturated map of common genetic variants associated with human height.		5,314,291 European ancestry, Hispanic or Latin American, East Asian ancestry, African ancestry, South Asian ancestry individuals		8q22.1	8	97713742	rs2331652-A	rs2331652	9e-09
8-97924666-98130180	36224396	GCST90245848	Height	Yengo L	Nature	A saturated map of common genetic variants associated with human height.		5,314,291 European ancestry, Hispanic or Latin American, East Asian ancestry, African ancestry, South Asian ancestry individuals		8q22.1	8	96435196	rs7837605-T	rs7837605	5e-23
8-97924666-98130180	35870639	GCST90239344	Carboxypeptidase Q level in Chronic kidney disease with hypertension and no diabetes (9394_19)	Surapaneni A	Kidney Int	Identification of 969 protein quantitative trait loci in an African American population with kidney disease attributed to hypertension.	level of carboxypeptidase Q in blood serum	466 African American individuals		8q22.1	8	96785310	rs34088584-A	rs34088584	4e-28
8-97924666-98130180	35361970	GCST90105038	Educational attainment	Okbay A	Nat Genet	Polygenic prediction of educational attainment within and between families from genome-wide association analyses in 3 million individuals.	educational attainment	3,037,499 European ancestry individuals		8q22.1	8	96728039	rs59093198-T	rs59093198	1e-10
8-97924666-98130180	35078996	GCST90090681	Serum levels of protein CPQ	Gudjonsson A	Nat Commun	A genome-wide association study of serum proteins reveals shared loci with common diseases.	blood protein measurement	5,362 Icelandic ancestry individuals		8q22.1	8	96645925	rs72680193-A	rs72680193	6e-28
8-97924666-98130180	35078996	GCST90090681	Serum levels of protein CPQ	Gudjonsson A	Nat Commun	A genome-wide association study of serum proteins reveals shared loci with common diseases.	blood protein measurement	5,362 Icelandic ancestry individuals		8q22.1	8	97011781	rs11984922-C	rs11984922	1e-46
8-97924666-98130180	35078996	GCST90090681	Serum levels of protein CPQ	Gudjonsson A	Nat Commun	A genome-wide association study of serum proteins reveals shared loci with common diseases.	blood protein measurement	5,362 Icelandic ancestry individuals		8q22.1	8	97029409	rs148684432-A	rs148684432	2e-118
8-97924666-98130180	34648354	GCST90246882	Carboxypeptidase Q levels	Pietzner M	Science	Mapping the proteo-genomic convergence of human diseases.	protein measurement	10,708 European ancestry individuals		8q22.1	8	96649840	rs2651447-A	rs2651447	3e-13
8-97924666-98130180	34648354	GCST90246882	Carboxypeptidase Q levels	Pietzner M	Science	Mapping the proteo-genomic convergence of human diseases.	protein measurement	10,708 European ancestry individuals		8q22.1	8	96821127	rs572906188-?	rs572906188	3e-43
8-97924666-98130180	34648354	GCST90246882	Carboxypeptidase Q levels	Pietzner M	Science	Mapping the proteo-genomic convergence of human diseases.	protein measurement	10,708 European ancestry individuals		8q22.1	8	96645925	rs72680193-A	rs72680193	2e-48
8-97924666-98130180	34648354	GCST90246882	Carboxypeptidase Q levels	Pietzner M	Science	Mapping the proteo-genomic convergence of human diseases.	protein measurement	10,708 European ancestry individuals		8q22.1	8	97029409	rs148684432-A	rs148684432	2e-154
8-97924666-98130180	34648354	GCST90246882	Carboxypeptidase Q levels	Pietzner M	Science	Mapping the proteo-genomic convergence of human diseases.	protein measurement	10,708 European ancestry individuals		8q22.1	8	96975384	rs11997742-T	rs11997742	2e-64
8-97924666-98130180	34594039	GCST90018964	Mean corpuscular hemoglobin	Sakaue S	Nat Genet	A cross-population atlas of genetic associations for 220 human phenotypes.	mean corpuscular hemoglobin	350,472 European ancestry individuals, 128,028 East Asian ancestry individuals		8q22.1	8	97696187	rs2438206-C	rs2438206	2e-27
8-97924666-98130180	34594039	GCST90018965	Mean corpuscular hemoglobin concentration	Sakaue S	Nat Genet	A cross-population atlas of genetic associations for 220 human phenotypes.	mean corpuscular hemoglobin concentration	350,468 European ancestry individuals, 135,482 East Asian ancestry individuals		8q22.1	8	97686963	rs34735761-A	rs34735761	3e-18
8-97924666-98130180	34594039	GCST90018966	Mean corpuscular volume	Sakaue S	Nat Genet	A cross-population atlas of genetic associations for 220 human phenotypes.		350,473 European ancestry individuals, 129,832 East Asian ancestry individuals		8q22.1	8	97696187	rs2438206-C	rs2438206	3e-13
8-97924666-98130180	34211149	GCST90000047	Age at first sexual intercourse	Mills MC	Nat Hum Behav	Identification of 371 genetic variants for age at first sex and birth linked to externalising behaviour.	age at first sexual intercourse measurement	397,338 European ancestry individuals		8q22.1	8	96812980	rs10955084-C	rs10955084	3e-10
8-97924666-98130180	32888493	GCST90002332	Mean corpuscular hemoglobin concentration	Chen MH	Cell	Trans-ethnic and Ancestry-Specific Blood-Cell Genetics in 746,667 Individuals from 5 Global Populations.	mean corpuscular hemoglobin concentration	642,173 African American or Afro-Caribbean, African ancestry, European ancestry, East Asian ancestry, Hispanic or Latin American and South Asian ancestry individuals		8q22.1	8	97694195	rs2438197-C	rs2438197	3e-30
8-97924666-98130180	32888493	GCST90002322	Mean corpuscular hemoglobin	Chen MH	Cell	Trans-ethnic and Ancestry-Specific Blood-Cell Genetics in 746,667 Individuals from 5 Global Populations.	mean corpuscular hemoglobin concentration	486,823 European ancestry individuals		8q22.1	8	97652425	rs2468024-A	rs2468024	4e-32
8-97924666-98130180	32888493	GCST90002326	Mean corpuscular hemoglobin	Chen MH	Cell	Trans-ethnic and Ancestry-Specific Blood-Cell Genetics in 746,667 Individuals from 5 Global Populations.	mean corpuscular hemoglobin concentration	630,125 African American or Afro-Caribbean, African ancestry, European ancestry, East Asian ancestry, Hispanic or Latin American and South Asian ancestry individuals		8q22.1	8	97669543	rs2513369-G	rs2513369	2e-35
8-97924666-98130180	32888493	GCST90002338	Mean corpuscular volume	Chen MH	Cell	Trans-ethnic and Ancestry-Specific Blood-Cell Genetics in 746,667 Individuals from 5 Global Populations.		696,882 African American or Afro-Caribbean, African ancestry, European ancestry, East Asian ancestry, Hispanic or Latin American and South Asian ancestry individuals		8q22.1	8	97696187	rs2438206-C	rs2438206	3e-15
8-97924666-98130180	32888493	GCST90002334	Mean corpuscular volume	Chen MH	Cell	Trans-ethnic and Ancestry-Specific Blood-Cell Genetics in 746,667 Individuals from 5 Global Populations.		544,127 European ancestry individuals		8q22.1	8	97627834	rs1031868-G	rs1031868	4e-16
8-97924666-98130180	32888494	GCST90002404	Red cell distribution width	Vuckovic D	Cell	The Polygenic and Monogenic Basis of Blood Traits and Diseases.	Red cell distribution width	408,112 British individuals		8q22.1	8	97669543	rs2513369-G	rs2513369	6e-60
8-97924666-98130180	32888494	GCST90002391	Mean corpuscular hemoglobin concentration	Vuckovic D	Cell	The Polygenic and Monogenic Basis of Blood Traits and Diseases.	mean corpuscular hemoglobin concentration	408,112 British individuals		8q22.1	8	97652425	rs2468024-A	rs2468024	1e-24
8-97924666-98130180	32888494	GCST90002392	Mean corpuscular volume	Vuckovic D	Cell	The Polygenic and Monogenic Basis of Blood Traits and Diseases.		408,112 British individuals		8q22.1	8	97652425	rs2468024-A	rs2468024	6e-17
8-97924666-98130180	32888494	GCST90002390	Mean corpuscular hemoglobin	Vuckovic D	Cell	The Polygenic and Monogenic Basis of Blood Traits and Diseases.	mean corpuscular hemoglobin	408,112 British individuals		8q22.1	8	97652425	rs2468024-A	rs2468024	5e-31
8-97924666-98130180	32888493	GCST90002369	Red cell distribution width	Chen MH	Cell	Trans-ethnic and Ancestry-Specific Blood-Cell Genetics in 746,667 Individuals from 5 Global Populations.	Red cell distribution width	531,774 European ancestry individuals		8q22.1	8	97669543	rs2513369-C	rs2513369	2e-72
8-97924666-98130180	32888493	GCST90002372	Red cell distribution width	Chen MH	Cell	Trans-ethnic and Ancestry-Specific Blood-Cell Genetics in 746,667 Individuals from 5 Global Populations.	Red cell distribution width	563,352 African American or Afro-Caribbean, African ancestry, European ancestry, East Asian ancestry, Hispanic or Latin American and South Asian ancestry individuals		8q22.1	8	97669543	rs2513369-C	rs2513369	2e-72
8-97924666-98130180	32778093	GCST011427	Protein quantitative trait loci (liver)	He B	BMC Biol	Genome-wide pQTL analysis of protein expression regulatory networks in the human liver.	protein measurement	172 European ancestry individuals, 29 Black individuals, 86 individuals		8q22.1	8	96660539	rs192039518-A	rs192039518	1e-08
8-97924666-98130180	32541925	GCST010555	Type 2 diabetes	Vujkovic M	Nat Genet	Discovery of 318 new risk loci for type 2 diabetes and related vascular outcomes among 1.4 million participants in a multi-ancestry meta-analysis.	type 2 diabetes mellitus	148,726 European ancestry cases, 965,732 European ancestry controls		8q22.1	8	96725513	rs149364428-G	rs149364428	6e-13
8-97924666-98130180	32541925	GCST010549	Peripheral arterial disease x type 2 diabetes interaction	Vujkovic M	Nat Genet	Discovery of 318 new risk loci for type 2 diabetes and related vascular outcomes among 1.4 million participants in a multi-ancestry meta-analysis.	type 2 diabetes mellitus, peripheral arterial disease	5,882 European ancestry cases, 161,348 European ancestry controls		8q22.1	8	96318798	rs3104154-T	rs3104154	3e-08
8-97924666-98130180	32231278	GCST010002	Refractive error	Hysi PG	Nat Genet	Meta-analysis of 542,934 subjects of European ancestry identifies new genes and mechanisms predisposing to refractive error and myopia.	Abnormality of refraction	542,934 European ancestry individuals		8q22.1	8	96598612	rs2575725-?	rs2575725	4e-09
8-97924666-98130180	31174203	GCST008871	Basal cell carcinoma	Liyanage UE	Hum Mol Genet	Combined analysis of keratinocyte cancers identifies novel genome-wide loci.	basal cell carcinoma	31,787 European ancestry cases, 619,351 European ancestry controls		8q22.1	8	97354773	rs7833199-C	rs7833199	2e-09
8-97924666-98130180	31174203	GCST008870	Keratinocyte cancer (MTAG)	Liyanage UE	Hum Mol Genet	Combined analysis of keratinocyte cancers identifies novel genome-wide loci.	keratinocyte carcinoma	at least 18,538 European ancestry cases, at least 340,302 European ancestry controls		8q22.1	8	97355656	rs4735451-T	rs4735451	5e-09
8-97924666-98130180	30595370	GCST007068	Mean corpuscular hemoglobin	Kichaev G	Am J Hum Genet	Leveraging Polygenic Functional Enrichment to Improve GWAS Power.	mean corpuscular hemoglobin	approximately 443,000 European ancestry individuals		8q22.1	8	97652425	rs2468024-?	rs2468024	4e-29
8-97924666-98130180	30595370	GCST007080	Lung function (FEV1/FVC)	Kichaev G	Am J Hum Genet	Leveraging Polygenic Functional Enrichment to Improve GWAS Power.	FEV/FVC ratio	approximately 370,000 European ancestry individuals		8q22.1	8	96507448	rs2437780-?	rs2437780	4e-11
8-97924666-98130180	30297969	GCST009379	Type 2 diabetes	Mahajan A	Nat Genet	Fine-mapping type 2 diabetes loci to single-variant resolution using high-density imputation and islet-specific epigenome maps.	type 2 diabetes mellitus	74,124 European ancestry cases, 824,006 European ancestry controls		8q22.1	8	96725513	rs149364428-A	rs149364428	2e-12
8-97924666-98130180	30072576	GCST006585	Blood protein levels	Emilsson V	Science	Co-regulatory networks of human serum proteins link genetics to disease.	blood protein measurement	3,200 European ancestry individuals		8q22.1	8	96820290	rs145746079-T	rs145746079	7e-58
8-97924666-98130180	29403010	GCST005993	Mean corpuscular hemoglobin	Kanai M	Nat Genet	Genetic analysis of quantitative traits in the Japanese population links cell types to complex human diseases.	mean corpuscular hemoglobin	108,054 Japanese ancestry individuals		8q22.1	8	97708529	rs149211171-?	rs149211171	4e-08
8-97924666-98130180	28957414	GCST006804	Red cell distribution width	Pilling LC	PLoS One	Red blood cell distribution width: Genetic evidence for aging pathways in 116,666 volunteers.	Red cell distribution width	116,666 British ancestry individuals		8q22.1	8	97652425	rs2468024-A	rs2468024	7e-22
8-97924666-98130180	27903959	GCST008413	Core binding factor acute myeloid leukemia	Lv H	Oncotarget	Genome-wide haplotype association study identify the FGFR2 gene as a risk gene for acute myeloid leukemia.	acute myeloid leukemia	175 European ancestry cases, 218 European ancestry controls		8q22.1	[8, 8, 8, 8]	[97616058, 97621842, 97614231, 97615637]	rs2512430-G; rs2512434-G; rs2448148-C; rs2512429-A	rs2512430; rs2512434; rs2448148; rs2512429	4e-12
8-97924666-98130180	27903959	GCST008413	Core binding factor acute myeloid leukemia	Lv H	Oncotarget	Genome-wide haplotype association study identify the FGFR2 gene as a risk gene for acute myeloid leukemia.	acute myeloid leukemia	175 European ancestry cases, 218 European ancestry controls		8q22.1	[8, 8, 8, 8]	[97616058, 97621842, 97614231, 97615637]	rs2512430-A; rs2512434-G; rs2448148-C; rs2512429-A	rs2512430; rs2512434; rs2448148; rs2512429	9e-11
8-97924666-98130180	27863252	GCST004621	Red cell distribution width	Astle WJ	Cell	The Allelic Landscape of Human Blood Cell Trait Variation and Links to Common Complex Disease.	Red cell distribution width	171,529 European ancestry individuals		8q22.1	8	97639920	rs1155998-A	rs1155998	2e-16
8-97924666-98130180	27863252	GCST004630	Mean corpuscular hemoglobin	Astle WJ	Cell	The Allelic Landscape of Human Blood Cell Trait Variation and Links to Common Complex Disease.	mean corpuscular hemoglobin	172,332 European ancestry individuals		8q22.1	8	97627834	rs1031868-G	rs1031868	5e-12
8-97924666-98130180	27863252	GCST004605	Mean corpuscular hemoglobin concentration	Astle WJ	Cell	The Allelic Landscape of Human Blood Cell Trait Variation and Links to Common Complex Disease.	mean corpuscular hemoglobin concentration	172,851 European ancestry individuals		8q22.1	8	97627834	rs1031868-G	rs1031868	4e-09
8-97924666-98130180	27488534	GCST003629	Nicotine metabolite ratio in current smokers	Patel YM	Cancer Res	Novel Association of Genetic Markers Affecting CYP2A6 Activity and Lung Cancer Risk.	nicotine metabolite ratio	437 European ancestry individuals, 364 African American individuals, 453 Latino individuals, 674 Japanese American individuals, 311 Native Hawaiian ancestry individuals		8q22.1	8	97581926	rs2045966-G	rs2045966	3e-08
8-97924666-98130180	23518928	GCST001914	Estradiol plasma levels (breast cancer)	Liu M	Mol Endocrinol	TSPYL5 SNPs: association with plasma estradiol concentrations and aromatase expression.	estradiol measurement	700 European ancestry cases, 50 African ancestry cases, 17 Asian ancestry cases, 5 American Indian ancestry cases		8q22.1	8	97269961	rs1864729-?	rs1864729	3e-08
8-97924666-98130180	20802479	GCST000782	Migraine	Anttila V	Nat Genet	Genome-wide association study of migraine implicates a common susceptibility variant on 8q22.1.	migraine disorder	2,731 European ancestry cases, 10,747 European ancestry controls	3,202 European ancestry cases, 40,062 European ancestry controls	8q22.1	8	97154685	rs1835740-A	rs1835740	2e-11
GWAS:genome-wide association studies; PMID: PubMed Unique Identifier; LD: linkage disequilibrium; SNP: single-nucleotide polymorphism; CHR: chromosome; POS: base position
aLD-independent risk loci was identified by clumping for the index variant with P-value≤5e-8 and other variants with P-value≤5e-6, located within 500 kilobase distance, and LD correlated with the index variant (r2≥0.1).
b Genomic positions are based on human genome assembly hg19.

## Sheet: Supplementary Table 5
Supplementary Table 5 The expression quantitative trait locus (eQTL) results for GWAS signals within the identified LD-independent risk locus.
LD-independent risk locusa (chromosome:start to end)	Data source	Tissue	Ensembl ID	Gene symbol	SNP	Reference allele	Effect allele	BETA from GWAS summary statistics	BETA from eQTL summary statistics	P from GWAS	P from eQTL	PP.SNP.H4	PP.H0	PP.H1	PP.H2	PP.H3	PP.H4
chr8:97924666-98112631	GTEx V8	Breast Mammary Tissue	ENSG00000104324	CPQ	rs73281775	G	A	0.998643	0.419312	1.46254e-07	2.82376e-14	0.414873	2.69866e-09	6.88879e-07	0.000389905	0.0986288	0.900981
chr8:97924666-98112631	GTEx V8	Esophagus Muscularis	ENSG00000104324	CPQ	rs10086925	A	T	0.977771	0.325852	2.1724e-07	1.38921e-12	0.183662	2.32149e-08	5.926e-06	0.000400351	0.101298	0.898296
chr8:97924666-98112631	GTEx V8	Nerve Tibial	ENSG00000104324	CPQ	rs10086925	A	T	0.977771	0.280213	2.1724e-07	1.89937e-13	0.232159	7.15719e-09	1.82699e-06	0.00042786	0.108327	0.891243
chr8:97924666-98112631	GTEx V8	Testis	ENSG00000104324	CPQ	rs10955096	C	T	0.980219	0.312141	2.02267e-07	1.80677e-10	0.352214	1.28483e-06	0.000327975	0.000427897	0.108337	0.890906
chr8:97924666-98112631	GTEx V8	Artery Aorta	ENSG00000104324	CPQ	rs10086925	A	T	0.977771	0.42647	2.1724e-07	3.57957e-09	0.178513	5.55011e-06	0.00141676	0.000430665	0.109045	0.889102
chr8:97924666-98112631	GTEx V8	Thyroid	ENSG00000104324	CPQ	rs7011934	A	C	0.968474	0.338623	2.55975e-07	1.45423e-16	0.377453	8.02261e-11	2.04791e-08	0.000443491	0.112321	0.887235
chr8:97924666-98112631	GTEx V8	Lung	ENSG00000104324	CPQ	rs73268709	T	C	0.977771	0.408288	2.1724e-07	5.0322e-15	0.322392	7.61175e-10	1.94303e-07	0.000444337	0.112537	0.887018
chr8:97924666-98112631	GTEx V8	Artery Tibial	ENSG00000104324	CPQ	rs9297272	C	G	0.97736	0.381696	2.18522e-07	4.10518e-15	0.883648	1.81887e-09	4.64296e-07	0.000446058	0.112977	0.886576
chr8:97924666-98112631	GTEx V8	Adipose Visceral Omentum	ENSG00000104324	CPQ	rs10086925	A	T	0.977771	0.369015	2.1724e-07	1.09307e-12	0.317208	3.34117e-08	8.5289e-06	0.000446915	0.113196	0.886348
chr8:97924666-98112631	GTEx V8	Skin Not Sun Exposed Suprapubic	ENSG00000104324	CPQ	rs10086925	A	T	0.977771	0.365035	2.1724e-07	5.35833e-15	0.312907	7.71693e-10	1.96988e-07	0.000447135	0.113252	0.8863
chr8:97924666-98112631	GTEx V8	Esophagus Mucosa	ENSG00000104324	CPQ	rs73268709	T	C	0.977771	0.280733	2.1724e-07	2.29208e-12	0.21606	3.83362e-08	9.78596e-06	0.0004478	0.113422	0.88612
chr8:97924666-98112631	GTEx V8	Whole Blood	ENSG00000104324	CPQ	rs9297272	C	G	0.97736	0.298639	2.18522e-07	6.62293e-17	0.830481	9.21033e-11	2.35109e-08	0.000448038	0.113483	0.886069
chr8:97924666-98112631	GTEx V8	Skin Sun Exposed Lower leg	ENSG00000104324	CPQ	rs9297272	C	G	0.97736	0.370137	2.18522e-07	1.02403e-16	0.626508	9.45838e-11	2.41441e-08	0.000448763	0.113668	0.885883
chr8:97924666-98112631	GTEx V8	Heart Atrial Appendage	ENSG00000104324	CPQ	rs10086925	A	T	0.977771	0.359213	2.1724e-07	4.23322e-09	0.290038	1.00829e-05	0.00257383	0.000445416	0.112816	0.884155
chr8:97924666-98112631	GTEx V8	Stomach	ENSG00000104324	CPQ	rs28870695	C	G	0.99851	0.293272	1.44196e-07	3.20617e-07	0.139951	7.46444e-05	0.0190542	0.000395255	0.100015	0.880461
chr8:97924666-98112631	GTEx V8	Cells Cultured fibroblasts	ENSG00000104324	CPQ	rs9297272	C	G	0.97736	0.236522	2.18522e-07	9.87413e-08	0.283314	8.83708e-05	0.0225581	0.000393912	0.0996753	0.877284
chr8:97924666-98112631	GTEx V8	Pancreas	ENSG00000104324	CPQ	rs10086925	A	T	0.977771	0.489284	2.1724e-07	3.08888e-07	0.18006	0.000121101	0.0309131	0.000420428	0.106459	0.862086
chr8:97924666-98112631	GTEx V8	Brain Putamen basal ganglia	ENSG00000104324	CPQ	rs9297271	G	A	1.00589	0.417936	1.27373e-07	1.33942e-05	0.130303	0.000686798	0.175317	0.000402614	0.102053	0.721541
chr8:97924666-98112631	GTEx V8	Esophagus Gastroesophageal Junction	ENSG00000104324	CPQ	rs10086925	A	T	0.977771	0.229447	2.1724e-07	2.41044e-05	0.0773154	0.000853183	0.217789	0.00030891	0.0781516	0.702897
chr8:97924666-98112631	GTEx V8	Pituitary	ENSG00000104324	CPQ	rs9297273	C	T	1.00737	0.412312	1.24035e-07	1.33513e-05	0.226507	0.00107347	0.274021	0.000251611	0.0635669	0.661087
chr8:97924666-98112631	GTEx V8	Spleen	ENSG00000104324	CPQ	rs10086925	A	T	0.977771	0.420711	2.1724e-07	1.38403e-05	0.140431	0.000970275	0.247679	0.000424198	0.10764	0.643286
chr8:97924666-98112631	GTEx V8	Muscle Skeletal	ENSG00000104324	CPQ	rs9297271	G	A	1.00589	0.18001	1.27373e-07	6.93478e-05	0.107084	0.00138822	0.354368	0.000251715	0.0636742	0.580318
chr8:97924666-98112631	GTEx V8	Esophagus Mucosa	ENSG00000253105	KB-1448A5.1	rs28463602	C	T	1.03026	0.31903	5.34766e-08	0.000871539	0.0462278	0.00153317	0.391367	0.000234605	0.0593394	0.547526
chr8:97924666-98112631	GTEx V8	Colon Transverse	ENSG00000104324	CPQ	rs10086925	A	T	0.977771	0.18479	2.1724e-07	2.78624e-05	0.189471	0.00167302	0.427066	0.000243228	0.0615786	0.509439
GWAS:genome-wide association studies; LD: linkage disequilibrium; GTEx: Genotype-Tissue Expression; SNP: single-nucleotide polymorphism; PP:posterior probability; H:hypotheses
aLD-independent risk loci was identified by clumping for the index variant with P-value≤5e-8 and other variants with P-value≤5e-6, located within 500 kilobase distance, and LD correlated with the index variant (r2≥0.1).
Hypotheses 0: no association with either trait; Hypotheses 1: association with trait 1 only; Hypotheses 2: association with trait 2 only; Hypotheses 3:both traits are associated but distinct causal variants were for two traits; Hypotheses 4: both traits are associated, and the same shares causal variant for both traits.

## Sheet: Supplementary Table 6
Supplementary Table 6 The protein quantitative trait locus (pQTL) results for GWAS signals within the identified LD-independent risk locus.
LD-independent risk locusa (chromosome:start to end)	Data source	Tissue	Ensembl ID	Gene symbol	SNP	Reference allele	Effect allele	BETA from GWAS summary statistics	BETA from eQTL summary statistics	P from GWAS	P from eQTL	PP.SNP.H4	PP.H0	PP.H1	PP.H2	PP.H3	PP.H4
chr8:97924666-98112631	PMID:35078996	AGES blood	ENSG00000104324	CPQ	rs28749318	T	A	1.03138	0.673979	6.43169e-08	9.47982e-46	0.0531964	2.74629e-42	6.47995e-40	0.000305073	0.0710542	0.928641
chr8:97924666-98112631	PMID:35078996	AGES blood	ENSG00000156467	UQCRB	rs56295838	G	A	1.0444	-0.0645227	5.07488e-08	0.124725	0.0292962	0.00394469	0.93076	3.09602e-05	0.00724711	0.058017
chr8:97924666-98112631	PMID:35078996	AGES blood	ENSG00000156482	RPL30	rs10111293	G	A	1.02836	-0.0443553	4.66759e-08	0.30414	0.026401	0.00402324	0.949293	2.77808e-05	0.00651481	0.0401409
chr8:97924666-98112631	PMID:35078996	AGES blood	ENSG00000132561	MATN2	rs73698822	G	A	1.03211	0.0474918	5.16523e-08	0.303107	0.0289223	0.00405733	0.957337	2.22412e-05	0.0052145	0.033369
GWAS:genome-wide association studies; LD: linkage disequilibrium; PMID: PubMed Unique Identifier; SNP: single-nucleotide polymorphism; PP:posterior probability; H:hypotheses
aLD-independent risk loci was identified by clumping for the index variant with P-value≤5e-8 and other variants with P-value≤5e-6, located within 500 kilobase distance, and LD correlated with the index variant (r2≥0.1).
Hypotheses 0: no association with either trait; Hypotheses 1: association with trait 1 only; Hypotheses 2: association with trait 2 only; Hypotheses 3:both traits are associated but distinct causal variants were for two traits; Hypotheses 4: both traits are associated, and the same shares causal variant for both traits.

## Sheet: Supplementary Table 7
Supplementary Table 7 The splicing quantitative trait locus (sQTL) results for GWAS signals within the identified LD-independent risk locus.
LD-independent risk locusa (chromosome:start to end)	Data source	Tissue	Ensembl ID	Gene symbol	Splice ID	SNP	Reference allele	Effect allele	BETA from GWAS summary statistics	BETA from eQTL summary statistics	P from GWAS	P from eQTL	PP.SNP.H4	PP.H0	PP.H1	PP.H2	PP.H3	PP.H4
chr8:97924666-98112631	GTEx V8	Adipose Visceral Omentum	ENSG00000104324	CPQ	chr8:97055645:97066009:clu_60597:ENSG00000104324.15	rs9297270	T	C	1.00737	-0.649515	1.24035e-07	7.30945e-09	0.195831	7.19976e-06	0.00183786	0.000336114	0.0848858	0.912933
chr8:97924666-98112631	GTEx V8	Whole Blood	ENSG00000104324	CPQ	chr8:97029494:97066009:clu_49169:ENSG00000104324.15	rs10955095	A	T	1.01168	0.530428	1.11729e-07	6.49641e-12	0.282879	7.04383e-08	1.79806e-05	0.000389848	0.0986144	0.900978
chr8:97924666-98112631	GTEx V8	Skin Not Sun Exposed Suprapubic	ENSG00000104324	CPQ	chr8:97029494:97066009:clu_62357:ENSG00000104324.15	rs10955096	C	T	0.980219	0.552231	2.02267e-07	9.02303e-10	0.259242	2.94964e-06	0.000752946	0.000390873	0.098877	0.899976
chr8:97924666-98112631	GTEx V8	Adipose Visceral Omentum	ENSG00000104324	CPQ	chr8:97029494:97066009:clu_60597:ENSG00000104324.15	rs10086925	A	T	0.977771	0.568188	2.1724e-07	1.50581e-08	0.105282	9.03535e-06	0.00230643	0.000385494	0.097504	0.899795
chr8:97924666-98112631	GTEx V8	Thyroid	ENSG00000104324	CPQ	chr8:97055645:97056406:clu_66477:ENSG00000104324.15	rs10086925	A	T	0.977771	-0.669598	2.1724e-07	3.35925e-12	0.155808	3.66799e-08	9.36317e-06	0.000400729	0.101395	0.898195
chr8:97924666-98112631	GTEx V8	Thyroid	ENSG00000104324	CPQ	chr8:97056545:97066009:clu_66477:ENSG00000104324.15	rs73281775	G	A	0.998643	-0.74704	1.46254e-07	2.32418e-12	0.185005	2.66652e-08	6.80675e-06	0.00040132	0.101546	0.898046
chr8:97924666-98112631	GTEx V8	Whole Blood	ENSG00000104324	CPQ	chr8:97055645:97066009:clu_49169:ENSG00000104324.15	rs9297272	C	G	0.97736	-0.551489	2.18522e-07	1.46632e-12	0.252173	3.30942e-08	8.44786e-06	0.000426083	0.107873	0.891692
chr8:97924666-98112631	GTEx V8	Colon Sigmoid	ENSG00000104324	CPQ	chr8:97029494:97066009:clu_55753:ENSG00000104324.15	rs10955096	C	T	0.980219	0.827988	2.02267e-07	1.59907e-08	0.23565	1.97902e-05	0.00505178	0.000410859	0.103988	0.890529
chr8:97924666-98112631	GTEx V8	Artery Aorta	ENSG00000104324	CPQ	chr8:97029494:97066009:clu_54909:ENSG00000104324.15	rs9297269	G	C	0.980057	0.754721	2.03133e-07	6.29876e-09	0.273853	1.20144e-05	0.00306687	0.000423624	0.107248	0.88925
chr8:97924666-98112631	GTEx V8	Skin Sun Exposed Lower leg	ENSG00000104324	CPQ	chr8:97029494:97055529:clu_63814:ENSG00000104324.15	rs10086925	A	T	0.977771	-0.643736	2.1724e-07	1.28623e-08	0.21748	1.65237e-05	0.00421794	0.000419289	0.106141	0.889205
chr8:97924666-98112631	GTEx V8	Nerve Tibial	ENSG00000104324	CPQ	chr8:97029494:97055529:clu_64249:ENSG00000104324.15	rs10086925	A	T	0.977771	-0.895825	2.1724e-07	5.20787e-15	0.301212	7.29536e-10	1.86226e-07	0.000440038	0.111439	0.888121
chr8:97924666-98112631	GTEx V8	Adipose Subcutaneous	ENSG00000104324	CPQ	chr8:97055645:97066009:clu_62274:ENSG00000104324.15	rs10086925	A	T	0.977771	-0.742515	2.1724e-07	1.64642e-10	0.281384	1.01041e-06	0.000257924	0.000440131	0.111463	0.887838
chr8:97924666-98112631	GTEx V8	Artery Tibial	ENSG00000104324	CPQ	chr8:97055645:97066009:clu_57445:ENSG00000104324.15	rs10086925	A	T	0.977771	-0.822551	2.1724e-07	1.20723e-14	0.329936	1.44668e-09	3.6929e-07	0.000442628	0.112101	0.887456
chr8:97924666-98112631	GTEx V8	Adipose Subcutaneous	ENSG00000104324	CPQ	chr8:97029494:97055529:clu_62274:ENSG00000104324.15	rs9297272	C	G	0.97736	-0.764477	2.18522e-07	1.01981e-09	0.307734	3.98925e-06	0.00101832	0.000441066	0.111703	0.886834
chr8:97924666-98112631	GTEx V8	Skin Sun Exposed Lower leg	ENSG00000104324	CPQ	chr8:97029494:97066009:clu_63814:ENSG00000104324.15	rs9297272	C	G	0.97736	0.815791	2.18522e-07	8.55847e-14	0.310329	5.46099e-09	1.39401e-06	0.000445594	0.112859	0.886694
chr8:97924666-98112631	GTEx V8	Artery Tibial	ENSG00000104324	CPQ	chr8:97029494:97066009:clu_57445:ENSG00000104324.15	rs10086925	A	T	0.977771	0.941395	2.1724e-07	1.2163e-18	0.423251	2.74143e-12	6.99796e-10	0.000445973	0.112955	0.886599
chr8:97924666-98112631	GTEx V8	Esophagus Muscularis	ENSG00000104324	CPQ	chr8:97029494:97066009:clu_57232:ENSG00000104324.15	rs10086925	A	T	0.977771	0.707329	2.1724e-07	9.99913e-10	0.210556	2.67416e-06	0.000682624	0.0004434	0.112299	0.886573
chr8:97924666-98112631	GTEx V8	Nerve Tibial	ENSG00000104324	CPQ	chr8:97029494:97066009:clu_64249:ENSG00000104324.15	rs10086925	A	T	0.977771	1.05138	2.1724e-07	1.84873e-20	0.318849	1.058e-13	2.70071e-11	0.00044659	0.113113	0.88644
chr8:97924666-98112631	GTEx V8	Adipose Subcutaneous	ENSG00000104324	CPQ	chr8:97029494:97066009:clu_62274:ENSG00000104324.15	rs10086925	A	T	0.977771	0.885892	2.1724e-07	1.11804e-14	0.328449	1.36253e-09	3.47809e-07	0.000446663	0.113132	0.886421
chr8:97924666-98112631	GTEx V8	Artery Tibial	ENSG00000104324	CPQ	chr8:97029494:97055529:clu_57445:ENSG00000104324.15	rs10086925	A	T	0.977771	-0.873657	2.1724e-07	7.23896e-15	0.408336	1.24578e-09	3.18006e-07	0.000446862	0.113183	0.88637
chr8:97924666-98112631	GTEx V8	Nerve Tibial	ENSG00000104324	CPQ	chr8:97055645:97066009:clu_64249:ENSG00000104324.15	rs10086925	A	T	0.977771	-0.873477	2.1724e-07	7.80022e-15	0.270536	8.70064e-10	2.22099e-07	0.000447022	0.113223	0.886329
chr8:97924666-98112631	GTEx V8	Thyroid	ENSG00000104324	CPQ	chr8:97055645:97066009:clu_66477:ENSG00000104324.15	rs10086925	A	T	0.977771	-1.03488	2.1724e-07	1.85877e-29	0.333964	4.3863e-20	1.11968e-17	0.000447247	0.113281	0.886272
chr8:97924666-98112631	GTEx V8	Thyroid	ENSG00000104324	CPQ	chr8:97029494:97066009:clu_66477:ENSG00000104324.15	rs10086925	A	T	0.977771	1.04175	2.1724e-07	1.11514e-33	0.333603	4.27731e-23	1.09186e-20	0.000447313	0.113298	0.886255
chr8:97924666-98112631	GTEx V8	Thyroid	ENSG00000104324	CPQ	chr8:97029494:97055529:clu_66477:ENSG00000104324.15	rs73268709	T	C	0.977771	-0.913987	2.1724e-07	2.12981e-24	0.324526	1.70705e-16	4.35754e-14	0.000448176	0.113518	0.886033
chr8:97924666-98112631	GTEx V8	Artery Aorta	ENSG00000104324	CPQ	chr8:97055645:97066009:clu_54909:ENSG00000104324.15	rs28870695	C	G	0.99851	-0.693926	1.44196e-07	9.76817e-08	0.268017	6.29296e-05	0.0160638	0.000397644	0.100622	0.882853
chr8:97924666-98112631	GTEx V8	Skin Sun Exposed Lower leg	ENSG00000104324	CPQ	chr8:97055645:97066009:clu_63814:ENSG00000104324.15	rs9297272	C	G	0.97736	-0.620912	2.18522e-07	1.75954e-08	0.308347	2.90549e-05	0.00741675	0.000439556	0.111323	0.880791
chr8:97924666-98112631	GTEx V8	Skin Not Sun Exposed Suprapubic	ENSG00000104324	CPQ	chr8:97029494:97055529:clu_62357:ENSG00000104324.15	rs10955095	A	T	1.01168	-0.558317	1.11729e-07	5.75846e-07	0.191749	0.000129283	0.0330016	0.000351725	0.0889062	0.877611
chr8:97924666-98112631	GTEx V8	Whole Blood	ENSG00000104324	CPQ	chr8:97029494:97055529:clu_49169:ENSG00000104324.15	rs7011934	A	C	0.968474	-0.444783	2.55975e-07	1.06702e-07	0.250785	9.10636e-05	0.0232455	0.000419932	0.106325	0.869919
chr8:97924666-98112631	GTEx V8	Esophagus Muscularis	ENSG00000104324	CPQ	chr8:97055645:97066009:clu_57232:ENSG00000104324.15	rs10086925	A	T	0.977771	-0.617362	2.1724e-07	2.95245e-07	0.213994	0.000138498	0.0353539	0.000426806	0.108093	0.855987
chr8:97924666-98112631	GTEx V8	Colon Sigmoid	ENSG00000104324	CPQ	chr8:97055645:97066009:clu_55753:ENSG00000104324.15	rs10955096	C	T	0.980219	-0.731509	2.02267e-07	1.23879e-06	0.13623	0.000222266	0.0567371	0.000391437	0.0990774	0.843572
chr8:97924666-98112631	GTEx V8	Heart Atrial Appendage	ENSG00000104324	CPQ	chr8:97029494:97055529:clu_54882:ENSG00000104324.15	rs10086925	A	T	0.977771	-0.766011	2.1724e-07	1.67082e-06	0.137967	0.000286633	0.0731678	0.000387333	0.0980451	0.828113
chr8:97924666-98112631	GTEx V8	Heart Atrial Appendage	ENSG00000104324	CPQ	chr8:97029494:97066009:clu_54882:ENSG00000104324.15	rs10086925	A	T	0.977771	0.731487	2.1724e-07	1.65028e-06	0.157162	0.000318769	0.081371	0.000404716	0.102495	0.81541
chr8:97924666-98112631	GTEx V8	Esophagus Muscularis	ENSG00000104324	CPQ	chr8:97029494:97055529:clu_57232:ENSG00000104324.15	rs28463602	C	T	1.03026	-0.54922	5.34766e-08	2.95806e-05	0.16372	0.000743308	0.189742	0.000292088	0.0738249	0.735398
chr8:97924666-98112631	GTEx V8	Whole Blood	ENSG00000104324	CPQ	chr8:97056545:97066009:clu_49169:ENSG00000104324.15	rs80088884	G	A	1.02939	-0.362969	5.47767e-08	0.0001005	0.0755713	0.000793341	0.202514	0.00026823	0.0677416	0.728683
chr8:97924666-98112631	GTEx V8	Artery Aorta	ENSG00000104324	CPQ	chr8:97029494:97055529:clu_54909:ENSG00000104324.15	rs9297269	G	C	0.980057	-0.617897	2.03133e-07	2.07239e-05	0.0936505	0.000877463	0.223987	0.00030996	0.078426	0.696399
chr8:97924666-98112631	GTEx V8	Adipose Subcutaneous	ENSG00000104324	CPQ	chr8:97055645:97056406:clu_62274:ENSG00000104324.15	rs11998498	C	T	1.01366	-0.544566	1.09051e-07	7.53729e-05	0.0623611	0.000922129	0.235389	0.00027135	0.0685717	0.694846
chr8:97924666-98112631	GTEx V8	Nerve Tibial	ENSG00000104324	CPQ	chr8:97056545:97066009:clu_64249:ENSG00000104324.15	rs56295838	G	A	1.0444	-0.516197	5.07488e-08	7.75297e-05	0.130121	0.00106537	0.271954	0.000213663	0.0538682	0.672899
chr8:97924666-98112631	GTEx V8	Nerve Tibial	ENSG00000156469	MTERF3	chr8:96257114:96258357:clu_64245:ENSG00000156469.8	rs73698822	G	A	1.03211	0.4673	5.16523e-08	0.000178514	0.13702	0.00153736	0.392436	0.000224183	0.0566774	0.549125
chr8:97924666-98112631	GTEx V8	Skin Not Sun Exposed Suprapubic	ENSG00000104324	CPQ	chr8:97055645:97066009:clu_62357:ENSG00000104324.15	rs10955095	A	T	1.01168	-0.395102	1.11729e-07	0.000106533	0.119112	0.00167174	0.426741	0.00021675	0.0548125	0.516558
GWAS:genome-wide association studies; LD: linkage disequilibrium; GTEx: Genotype-Tissue Expression; SNP: single-nucleotide polymorphism; PP:posterior probability; H:hypotheses
aLD-independent risk loci was identified by clumping for the index variant with P-value≤5e-8 and other variants with P-value≤5e-6, located within 500 kilobase distance, and LD correlated with the index variant (r2≥0.1).
Hypotheses 0: no association with either trait; Hypotheses 1: association with trait 1 only; Hypotheses 2: association with trait 2 only; Hypotheses 3:both traits are associated but distinct causal variants were for two traits; Hypotheses 4: both traits are associated, and the same shares causal variant for both traits.

## Sheet: Supplementary Table 8
Supplementary Table 8 Protein-altering variants(PAV) linkage results for lead SNPs within the identified LD-independent risk locus.
LD-independent risk locusa (chromosome:start to end)	Ensembl ID	Gene symbol	Lead SNP	Proxy SNPb	Location	Consequence	Biotype	Impact	Sift	Clin sig
chr8:97924666-98112631	ENSG00000104324	CPQ	rs7817424	rs10504967	8:96861078-96861078	intron_variant	protein_coding	MODIFIER	-	-
chr8:97924666-98112631	ENSG00000104324	CPQ	rs7817424	rs28628406	8:96888214-96888214	intron_variant	protein_coding	MODIFIER	-	-
chr8:97924666-98112631	ENSG00000104324	CPQ	rs7817424	rs10104357	8:96907285-96907285	intron_variant	protein_coding	MODIFIER	-	-
chr8:97924666-98112631	ENSG00000104324	CPQ	rs7817424	rs73279838	8:96912438-96912438	intron_variant	protein_coding	MODIFIER	-	-
chr8:97924666-98112631	ENSG00000104324	CPQ	rs7817424	rs11991731	8:96915015-96915015	intron_variant	protein_coding	MODIFIER	-	-
chr8:97924666-98112631	ENSG00000104324	CPQ	rs7817424	rs11991504	8:96918210-96918210	intron_variant	protein_coding	MODIFIER	-	-
chr8:97924666-98112631	-		rs7817424	rs11991504	8:96918210-96918210	regulatory_region_variant	enhancer	MODIFIER	-	-
chr8:97924666-98112631	ENSG00000104324	CPQ	rs7817424	rs57511341	8:96918699-96918699	intron_variant	protein_coding	MODIFIER	-	-
chr8:97924666-98112631	-		rs7817424	rs57511341	8:96918699-96918699	regulatory_region_variant	enhancer	MODIFIER	-	-
chr8:97924666-98112631	ENSG00000104324	CPQ	rs7817424	rs28442008	8:96927117-96927117	intron_variant	protein_coding	MODIFIER	-	-
chr8:97924666-98112631	ENSG00000104324	CPQ	rs7817424	rs28398259	8:96928327-96928327	intron_variant	protein_coding	MODIFIER	-	-
chr8:97924666-98112631	ENSG00000104324	CPQ	rs7817424	rs28395300	8:96928997-96928997	intron_variant	protein_coding	MODIFIER	-	-
chr8:97924666-98112631	ENSG00000104324	CPQ	rs7817424	rs28493764	8:96929098-96929098	intron_variant	protein_coding	MODIFIER	-	-
chr8:97924666-98112631	ENSG00000104324	CPQ	rs7817424	rs61601235	8:96929503-96929503	intron_variant	protein_coding	MODIFIER	-	-
chr8:97924666-98112631	ENSG00000104324	CPQ	rs7817424	rs58193071	8:96929509-96929509	intron_variant	protein_coding	MODIFIER	-	-
chr8:97924666-98112631	ENSG00000104324	CPQ	rs7817424	rs73698817	8:96929844-96929844	intron_variant	protein_coding	MODIFIER	-	-
chr8:97924666-98112631	ENSG00000104324	CPQ	rs7817424	rs28551023	8:96930068-96930068	intron_variant	protein_coding	MODIFIER	-	-
chr8:97924666-98112631	ENSG00000104324	CPQ	rs7817424	rs10094858	8:96931002-96931002	intron_variant	protein_coding	MODIFIER	-	-
chr8:97924666-98112631	ENSG00000104324	CPQ	rs7817424	rs10108013	8:96931017-96931017	intron_variant	protein_coding	MODIFIER	-	-
chr8:97924666-98112631	ENSG00000104324	CPQ	rs7817424	rs10107928	8:96931083-96931083	intron_variant	protein_coding	MODIFIER	-	-
chr8:97924666-98112631	ENSG00000104324	CPQ	rs7817424	rs10107937	8:96931095-96931095	intron_variant	protein_coding	MODIFIER	-	-
chr8:97924666-98112631	ENSG00000104324	CPQ	rs7817424	rs10108385	8:96931370-96931370	intron_variant	protein_coding	MODIFIER	-	-
chr8:97924666-98112631	ENSG00000104324	CPQ	rs7817424	rs73698818	8:96931704-96931704	intron_variant	protein_coding	MODIFIER	-	-
chr8:97924666-98112631	-		rs7817424	rs73698818	8:96931704-96931704	regulatory_region_variant	enhancer	MODIFIER	-	-
chr8:97924666-98112631	ENSG00000104324	CPQ	rs7817424	rs73698820	8:96931746-96931746	intron_variant	protein_coding	MODIFIER	-	-
chr8:97924666-98112631	-		rs7817424	rs73698820	8:96931746-96931746	regulatory_region_variant	enhancer	MODIFIER	-	-
chr8:97924666-98112631	ENSG00000104324	CPQ	rs7817424	rs10112408	8:96932332-96932332	intron_variant	protein_coding	MODIFIER	-	-
chr8:97924666-98112631	ENSG00000104324	CPQ	rs7817424	rs10102611	8:96932935-96932935	intron_variant	protein_coding	MODIFIER	-	-
chr8:97924666-98112631	-		rs7817424	rs10102611	8:96932935-96932935	regulatory_region_variant	open_chromatin_region	MODIFIER	-	-
chr8:97924666-98112631	ENSG00000104324	CPQ	rs7817424	rs11993103	8:96933941-96933941	intron_variant	protein_coding	MODIFIER	-	-
chr8:97924666-98112631	ENSG00000104324	CPQ	rs7817424	rs73698822	8:96934187-96934187	intron_variant	protein_coding	MODIFIER	-	-
chr8:97924666-98112631	ENSG00000104324	CPQ	rs7817424	rs73698823	8:96934245-96934245	intron_variant	protein_coding	MODIFIER	-	-
chr8:97924666-98112631	ENSG00000104324	CPQ	rs7817424	rs11997887	8:96934958-96934958	intron_variant	protein_coding	MODIFIER	-	-
chr8:97924666-98112631	ENSG00000104324	CPQ	rs7817424	rs11994185	8:96935098-96935098	intron_variant	protein_coding	MODIFIER	-	-
chr8:97924666-98112631	ENSG00000104324	CPQ	rs7817424	rs73698825	8:96935740-96935740	intron_variant	protein_coding	MODIFIER	-	-
chr8:97924666-98112631	ENSG00000104324	CPQ	rs7817424	rs28463602	8:96938115-96938115	intron_variant	protein_coding	MODIFIER	-	-
chr8:97924666-98112631	ENSG00000104324	CPQ	rs7817424	rs10111293	8:96938618-96938618	intron_variant	protein_coding	MODIFIER	-	-
chr8:97924666-98112631	ENSG00000104324	CPQ	rs7817424	rs80088884	8:96940292-96940292	intron_variant	protein_coding	MODIFIER	-	-
chr8:97924666-98112631	ENSG00000104324	CPQ	rs7817424	rs10099984	8:96949902-96949902	intron_variant	protein_coding	MODIFIER	-	-
chr8:97924666-98112631	-		rs7817424	rs10099984	8:96949902-96949902	regulatory_region_variant	enhancer	MODIFIER	-	-
chr8:97924666-98112631	ENSG00000104324	CPQ	rs7817424	rs28605041	8:96952627-96952627	intron_variant	protein_coding	MODIFIER	-	-
chr8:97924666-98112631	ENSG00000104324	CPQ	rs7817424	rs10099706	8:96956976-96956976	intron_variant	protein_coding	MODIFIER	-	-
chr8:97924666-98112631	ENSG00000104324	CPQ	rs7817424	rs10092653	8:96958891-96958891	intron_variant	protein_coding	MODIFIER	-	-
chr8:97924666-98112631	ENSG00000104324	CPQ	rs7817424	rs28575601	8:96962331-96962331	intron_variant	protein_coding	MODIFIER	-	-
chr8:97924666-98112631	ENSG00000104324	CPQ	rs7817424	rs10087704	8:96963003-96963003	intron_variant	protein_coding	MODIFIER	-	-
chr8:97924666-98112631	ENSG00000104324	CPQ	rs7817424	rs10087996	8:96963357-96963357	intron_variant	protein_coding	MODIFIER	-	-
chr8:97924666-98112631	ENSG00000104324	CPQ	rs7817424	rs10106679	8:96964075-96964075	intron_variant	protein_coding	MODIFIER	-	-
chr8:97924666-98112631	ENSG00000104324	CPQ	rs7817424	rs10090663	8:96967242-96967242	intron_variant	protein_coding	MODIFIER	-	-
chr8:97924666-98112631	ENSG00000104324	CPQ	rs7817424	rs10111129	8:96968774-96968774	intron_variant	protein_coding	MODIFIER	-	-
chr8:97924666-98112631	-		rs7817424	rs10111129	8:96968774-96968774	regulatory_region_variant	open_chromatin_region	MODIFIER	-	-
chr8:97924666-98112631	ENSG00000104324	CPQ	rs7817424	rs3802194	8:96968881-96968881	intron_variant	protein_coding	MODIFIER	-	-
chr8:97924666-98112631	-		rs7817424	rs3802194	8:96968881-96968881	regulatory_region_variant	open_chromatin_region	MODIFIER	-	-
chr8:97924666-98112631	ENSG00000104324	CPQ	rs7817424	rs10106430	8:96970628-96970628	intron_variant	protein_coding	MODIFIER	-	-
chr8:97924666-98112631	ENSG00000104324	CPQ	rs7817424	rs78626826	8:96973013-96973013	intron_variant	protein_coding	MODIFIER	-	-
chr8:97924666-98112631	ENSG00000104324	CPQ	rs7817424	rs11984654	8:96973014-96973014	intron_variant	protein_coding	MODIFIER	-	-
chr8:97924666-98112631	ENSG00000104324	CPQ	rs7817424	rs12547473	8:96974974-96974974	intron_variant	protein_coding	MODIFIER	-	-
chr8:97924666-98112631	ENSG00000104324	CPQ	rs7817424	rs11997742	8:96975384-96975384	intron_variant	protein_coding	MODIFIER	-	-
chr8:97924666-98112631	ENSG00000104324	CPQ	rs7817424	rs10099492	8:96976532-96976532	intron_variant	protein_coding	MODIFIER	-	-
chr8:97924666-98112631	ENSG00000104324	CPQ	rs7817424	rs7827661	8:96984361-96984361	intron_variant	protein_coding	MODIFIER	-	-
chr8:97924666-98112631	ENSG00000104324	CPQ	rs7817424	rs73696604	8:96987192-96987192	intron_variant	protein_coding	MODIFIER	-	-
chr8:97924666-98112631	ENSG00000104324	CPQ	rs7817424	rs7817021	8:96989282-96989282	intron_variant	protein_coding	MODIFIER	-	-
chr8:97924666-98112631	ENSG00000104324	CPQ	rs7817424	rs7817424	8:96989466-96989466	intron_variant	protein_coding	MODIFIER	-	-
chr8:97924666-98112631	ENSG00000104324	CPQ	rs7817424	rs56295838	8:97001276-97001276	intron_variant	protein_coding	MODIFIER	-	-
chr8:97924666-98112631	ENSG00000104324	CPQ	rs7817424	rs28631213	8:97004692-97004692	intron_variant	protein_coding	MODIFIER	-	-
chr8:97924666-98112631	ENSG00000104324	CPQ	rs7817424	rs6468525	8:97006606-97006606	intron_variant	protein_coding	MODIFIER	-	-
chr8:97924666-98112631	-		rs7817424	rs6468525	8:97006606-97006606	regulatory_region_variant	enhancer	MODIFIER	-	-
chr8:97924666-98112631	ENSG00000104324	CPQ	rs7817424	rs11984922	8:97011781-97011781	intron_variant	protein_coding	MODIFIER	-	-
chr8:97924666-98112631	ENSG00000104324	CPQ	rs7817424	rs79492378	8:97013627-97013627	intron_variant	protein_coding	MODIFIER	-	-
chr8:97924666-98112631	ENSG00000104324	CPQ	rs7817424	rs11987777	8:97019990-97019990	intron_variant	protein_coding	MODIFIER	-	-
chr8:97924666-98112631	ENSG00000104324	CPQ	rs7817424	rs28749318	8:97020141-97020141	intron_variant	protein_coding	MODIFIER	-	-
chr8:97924666-98112631	ENSG00000104324	CPQ	rs7817424	rs28820108	8:97021654-97021654	intron_variant	protein_coding	MODIFIER	-	-
chr8:97924666-98112631	ENSG00000104324	CPQ	rs7817424	rs10104494	8:97025495-97025495	intron_variant	protein_coding	MODIFIER	-	-
chr8:97924666-98112631	ENSG00000104324	CPQ	rs7817424	rs10104494	8:97025495-97025495	upstream_gene_variant	protein_coding	MODIFIER	-	-
chr8:97924666-98112631	ENSG00000104324	CPQ	rs7817424	rs10107707	8:97025855-97025855	intron_variant	protein_coding	MODIFIER	-	-
chr8:97924666-98112631	ENSG00000104324	CPQ	rs7817424	rs10107707	8:97025855-97025855	upstream_gene_variant	protein_coding	MODIFIER	-	-
chr8:97924666-98112631	ENSG00000104324	CPQ	rs7817424	rs3890744	8:97030697-97030697	intron_variant	protein_coding	MODIFIER	-	-
chr8:97924666-98112631	ENSG00000104324	CPQ	rs7817424	rs10955095	8:97035576-97035576	intron_variant	protein_coding	MODIFIER	-	-
chr8:97924666-98112631	ENSG00000104324	CPQ	rs7817424	rs10955096	8:97036360-97036360	intron_variant	protein_coding	MODIFIER	-	-
chr8:97924666-98112631	ENSG00000104324	CPQ	rs7817424	rs78562693	8:97038054-97038054	intron_variant	protein_coding	MODIFIER	-	-
chr8:97924666-98112631	-		rs7817424	rs78562693	8:97038054-97038054	regulatory_region_variant	enhancer	MODIFIER	-	-
chr8:97924666-98112631	ENSG00000104324	CPQ	rs7817424	rs9297269	8:97039206-97039206	intron_variant	protein_coding	MODIFIER	-	-
chr8:97924666-98112631	ENSG00000104324	CPQ	rs7817424	rs201276270	8:97040896-97040896	intron_variant	protein_coding	MODIFIER	-	-
chr8:97924666-98112631	ENSG00000104324	CPQ	rs7817424	rs199649300	8:97042160-97042160	intron_variant	protein_coding	MODIFIER	-	-
chr8:97924666-98112631	ENSG00000104324	CPQ	rs7817424	rs28870695	8:97042546-97042546	intron_variant	protein_coding	MODIFIER	-	-
chr8:97924666-98112631	ENSG00000104324	CPQ	rs7817424	rs11998498	8:97044986-97044986	intron_variant	protein_coding	MODIFIER	-	-
chr8:97924666-98112631	ENSG00000104324	CPQ	rs7817424	rs73695755	8:97045946-97045946	intron_variant	protein_coding	MODIFIER	-	-
chr8:97924666-98112631	ENSG00000104324	CPQ	rs7817424	rs7011934	8:97046818-97046818	intron_variant	protein_coding	MODIFIER	-	-
chr8:97924666-98112631	ENSG00000104324	CPQ	rs7817424	rs6994621	8:97047175-97047175	intron_variant	protein_coding	MODIFIER	-	-
chr8:97924666-98112631	ENSG00000104324	CPQ	rs7817424	rs59916267	8:97049116-97049116	intron_variant	protein_coding	MODIFIER	-	-
chr8:97924666-98112631	ENSG00000104324	CPQ	rs7817424	rs73695756	8:97050608-97050608	intron_variant	protein_coding	MODIFIER	-	-
chr8:97924666-98112631	ENSG00000104324	CPQ	rs7817424	rs73695756	8:97050608-97050608	upstream_gene_variant	protein_coding_CDS_not_defined	MODIFIER	-	-
chr8:97924666-98112631	ENSG00000104324	CPQ	rs7817424	rs60893738	8:97053960-97053960	intron_variant	protein_coding	MODIFIER	-	-
chr8:97924666-98112631	ENSG00000104324	CPQ	rs7817424	rs60893738	8:97053960-97053960	upstream_gene_variant	protein_coding_CDS_not_defined	MODIFIER	-	-
chr8:97924666-98112631	ENSG00000104324	CPQ	rs7817424	rs12543489	8:97054043-97054043	intron_variant	protein_coding	MODIFIER	-	-
chr8:97924666-98112631	ENSG00000104324	CPQ	rs7817424	rs12543489	8:97054043-97054043	upstream_gene_variant	protein_coding_CDS_not_defined	MODIFIER	-	-
chr8:97924666-98112631	ENSG00000104324	CPQ	rs7817424	rs9297270	8:97054450-97054450	intron_variant	protein_coding	MODIFIER	-	-
chr8:97924666-98112631	ENSG00000104324	CPQ	rs7817424	rs9297270	8:97054450-97054450	upstream_gene_variant	protein_coding_CDS_not_defined	MODIFIER	-	-
chr8:97924666-98112631	ENSG00000104324	CPQ	rs7817424	rs9297271	8:97054575-97054575	intron_variant	protein_coding	MODIFIER	-	-
chr8:97924666-98112631	ENSG00000104324	CPQ	rs7817424	rs9297271	8:97054575-97054575	upstream_gene_variant	protein_coding_CDS_not_defined	MODIFIER	-	-
chr8:97924666-98112631	ENSG00000104324	CPQ	rs7817424	rs9297272	8:97055582-97055582	intron_variant	protein_coding	MODIFIER	-	-
chr8:97924666-98112631	ENSG00000104324	CPQ	rs7817424	rs9297272	8:97055582-97055582	non_coding_transcript_exon_variant	protein_coding_CDS_not_defined	MODIFIER	-	-
chr8:97924666-98112631	ENSG00000104324	CPQ	rs7817424	rs9297273	8:97055920-97055920	intron_variant	protein_coding	MODIFIER	-	-
chr8:97924666-98112631	ENSG00000104324	CPQ	rs7817424	rs9297273	8:97055920-97055920	intron_variant,non_coding_transcript_variant	protein_coding_CDS_not_defined	MODIFIER	-	-
chr8:97924666-98112631	ENSG00000104324	CPQ	rs7817424	rs9297274	8:97056109-97056109	intron_variant	protein_coding	MODIFIER	-	-
chr8:97924666-98112631	ENSG00000104324	CPQ	rs7817424	rs9297274	8:97056109-97056109	intron_variant,non_coding_transcript_variant	protein_coding_CDS_not_defined	MODIFIER	-	-
chr8:97924666-98112631	ENSG00000104324	CPQ	rs7817424	rs28509259	8:97056410-97056410	intron_variant	protein_coding	MODIFIER	-	-
chr8:97924666-98112631	ENSG00000104324	CPQ	rs7817424	rs28509259	8:97056410-97056410	intron_variant,non_coding_transcript_variant	protein_coding_CDS_not_defined	MODIFIER	-	-
chr8:97924666-98112631	ENSG00000104324	CPQ	rs7817424	rs28509259	8:97056410-97056410	non_coding_transcript_exon_variant	protein_coding_CDS_not_defined	MODIFIER	-	-
chr8:97924666-98112631	ENSG00000104324	CPQ	rs7817424	rs73281775	8:97057161-97057161	intron_variant	protein_coding	MODIFIER	-	-
chr8:97924666-98112631	ENSG00000104324	CPQ	rs7817424	rs73281775	8:97057161-97057161	intron_variant,non_coding_transcript_variant	protein_coding_CDS_not_defined	MODIFIER	-	-
chr8:97924666-98112631	ENSG00000104324	CPQ	rs7817424	rs73268709	8:97063414-97063414	intron_variant	protein_coding	MODIFIER	-	-
chr8:97924666-98112631	ENSG00000104324	CPQ	rs7817424	rs73268709	8:97063414-97063414	intron_variant,non_coding_transcript_variant	protein_coding_CDS_not_defined	MODIFIER	-	-
chr8:97924666-98112631	ENSG00000104324	CPQ	rs7817424	rs10086925	8:97063537-97063537	intron_variant	protein_coding	MODIFIER	-	-
chr8:97924666-98112631	ENSG00000104324	CPQ	rs7817424	rs10086925	8:97063537-97063537	intron_variant,non_coding_transcript_variant	protein_coding_CDS_not_defined	MODIFIER	-	-
chr8:97924666-98112631	ENSG00000104324	CPQ	rs7817424	rs10089867	8:97063656-97063656	intron_variant	protein_coding	MODIFIER	-	-
chr8:97924666-98112631	ENSG00000104324	CPQ	rs7817424	rs10089867	8:97063656-97063656	intron_variant,non_coding_transcript_variant	protein_coding_CDS_not_defined	MODIFIER	-	-
chr8:97924666-98112631	ENSG00000104324	CPQ	rs7817424	rs11990753	8:97069471-97069471	intron_variant	protein_coding	MODIFIER	-	-
chr8:97924666-98112631	ENSG00000104324	CPQ	rs7817424	rs11990753	8:97069471-97069471	intron_variant,non_coding_transcript_variant	protein_coding_CDS_not_defined	MODIFIER	-	-
chr8:97924666-98112631	ENSG00000104324	CPQ	rs7817424	rs12547253	8:97075110-97075110	intron_variant	protein_coding	MODIFIER	-	-
chr8:97924666-98112631	ENSG00000104324	CPQ	rs7817424	rs12547253	8:97075110-97075110	intron_variant,non_coding_transcript_variant	protein_coding_CDS_not_defined	MODIFIER	-	-
chr8:97924666-98112631	-		rs7817424	rs12547253	8:97075110-97075110	regulatory_region_variant	enhancer	MODIFIER	-	-
chr8:97924666-98112631	ENSG00000104324	CPQ	rs7817424	rs10955098	8:97078354-97078354	intron_variant	protein_coding	MODIFIER	-	-
chr8:97924666-98112631	ENSG00000104324	CPQ	rs7817424	rs10955098	8:97078354-97078354	intron_variant,non_coding_transcript_variant	protein_coding_CDS_not_defined	MODIFIER	-	-
chr8:97924666-98112631	ENSG00000104324	CPQ	rs7817424	rs13439480	8:97080309-97080309	intron_variant	protein_coding	MODIFIER	-	-
chr8:97924666-98112631	ENSG00000104324	CPQ	rs7817424	rs13439480	8:97080309-97080309	intron_variant,non_coding_transcript_variant	protein_coding_CDS_not_defined	MODIFIER	-	-
chr8:97924666-98112631	ENSG00000104324	CPQ	rs7817424	rs13438930	8:97080484-97080484	intron_variant	protein_coding	MODIFIER	-	-
chr8:97924666-98112631	ENSG00000104324	CPQ	rs7817424	rs13438930	8:97080484-97080484	intron_variant,non_coding_transcript_variant	protein_coding_CDS_not_defined	MODIFIER	-	-
chr8:97924666-98112631	ENSG00000104324	CPQ	rs7817424	rs13439555	8:97080698-97080698	intron_variant	protein_coding	MODIFIER	-	-
chr8:97924666-98112631	ENSG00000104324	CPQ	rs7817424	rs13439555	8:97080698-97080698	intron_variant,non_coding_transcript_variant	protein_coding_CDS_not_defined	MODIFIER	-	-
chr8:97924666-98112631	ENSG00000104324	CPQ	rs7817424	rs11998215	8:97084675-97084675	intron_variant	protein_coding	MODIFIER	-	-
chr8:97924666-98112631	ENSG00000104324	CPQ	rs7817424	rs11998215	8:97084675-97084675	intron_variant,non_coding_transcript_variant	protein_coding_CDS_not_defined	MODIFIER	-	-
chr8:97924666-98112631	-		rs7817424	rs11998215	8:97084675-97084675	regulatory_region_variant	open_chromatin_region	MODIFIER	-	-
chr8:97924666-98112631	ENSG00000104324	CPQ	rs7817424	rs113960715	8:97085305-97085305	intron_variant	protein_coding	MODIFIER	-	-
chr8:97924666-98112631	ENSG00000104324	CPQ	rs7817424	rs113960715	8:97085305-97085305	intron_variant,non_coding_transcript_variant	protein_coding_CDS_not_defined	MODIFIER	-	-
chr8:97924666-98112631	ENSG00000104324	CPQ	rs7817424	rs72664567	8:97085396-97085396	intron_variant	protein_coding	MODIFIER	-	-
chr8:97924666-98112631	ENSG00000104324	CPQ	rs7817424	rs72664567	8:97085396-97085396	intron_variant,non_coding_transcript_variant	protein_coding_CDS_not_defined	MODIFIER	-	-
chr8:97924666-98112631	ENSG00000104324	CPQ	rs7817424	rs28408038	8:97089405-97089405	intron_variant	protein_coding	MODIFIER	-	-
chr8:97924666-98112631	ENSG00000104324	CPQ	rs7817424	rs28408038	8:97089405-97089405	intron_variant,non_coding_transcript_variant	protein_coding_CDS_not_defined	MODIFIER	-	-
chr8:97924666-98112631	-		rs7817424	rs28408038	8:97089405-97089405	regulatory_region_variant	enhancer	MODIFIER	-	-
chr8:97924666-98112631	ENSG00000104324	CPQ	rs7817424	rs10955100	8:97091168-97091168	intron_variant	protein_coding	MODIFIER	-	-
chr8:97924666-98112631	ENSG00000104324	CPQ	rs7817424	rs10955100	8:97091168-97091168	intron_variant,non_coding_transcript_variant	protein_coding_CDS_not_defined	MODIFIER	-	-
chr8:97924666-98112631	-		rs7817424	rs10955100	8:97091168-97091168	regulatory_region_variant	enhancer	MODIFIER	-	-
chr8:97924666-98112631	ENSG00000104324	CPQ	rs7817424	rs11992953	8:97092405-97092405	intron_variant	protein_coding	MODIFIER	-	-
chr8:97924666-98112631	ENSG00000104324	CPQ	rs7817424	rs11992953	8:97092405-97092405	non_coding_transcript_exon_variant	protein_coding_CDS_not_defined	MODIFIER	-	-
chr8:97924666-98112631	ENSG00000104324	CPQ	rs7817424	rs10955101	8:97093865-97093865	intron_variant	protein_coding	MODIFIER	-	-
chr8:97924666-98112631	ENSG00000104324	CPQ	rs7817424	rs10955101	8:97093865-97093865	downstream_gene_variant	protein_coding_CDS_not_defined	MODIFIER	-	-
chr8:97924666-98112631	ENSG00000104324	CPQ	rs7817424	rs10098932	8:97094217-97094217	intron_variant	protein_coding	MODIFIER	-	-
chr8:97924666-98112631	ENSG00000104324	CPQ	rs7817424	rs10098932	8:97094217-97094217	downstream_gene_variant	protein_coding_CDS_not_defined	MODIFIER	-	-
chr8:97924666-98112631	ENSG00000104324	CPQ	rs7817424	rs12114373	8:97095222-97095222	intron_variant	protein_coding	MODIFIER	-	-
chr8:97924666-98112631	ENSG00000104324	CPQ	rs7817424	rs12114373	8:97095222-97095222	downstream_gene_variant	protein_coding_CDS_not_defined	MODIFIER	-	-
chr8:97924666-98112631	ENSG00000104324	CPQ	rs7817424	rs12114789	8:97097045-97097045	intron_variant	protein_coding	MODIFIER	-	-
chr8:97924666-98112631	ENSG00000104324	CPQ	rs7817424	rs12114789	8:97097045-97097045	downstream_gene_variant	protein_coding_CDS_not_defined	MODIFIER	-	-
chr8:97924666-98112631	ENSG00000104324	CPQ	rs7817424	rs10955102	8:97100403-97100403	intron_variant	protein_coding	MODIFIER	-	-
chr8:97924666-98112631	-		rs7817424	rs10955102	8:97100403-97100403	regulatory_region_variant	enhancer	MODIFIER	-	-
chr8:97924666-98112631	ENSG00000104324	CPQ	rs7817424	rs12334323	8:97115826-97115826	intron_variant	protein_coding	MODIFIER	-	-
chr8:97924666-98112631	ENSG00000104324	CPQ	rs7817424	rs35952478	8:97116926-97116926	intron_variant	protein_coding	MODIFIER	-	-
chr8:97924666-98112631	ENSG00000104324	CPQ	rs7817424	rs7844514	8:97117952-97117952	intron_variant	protein_coding	MODIFIER	-	-
GWAS:genome-wide association studies; SNP: single-nucleotide polymorphism; -: no information
aLD-independent risk loci was identified by clumping for the index variant with P-value≤5e-8 and other variants with P-value≤5e-6, located within 500 kilobase distance, and LD correlated with the index variant (r2≥0.1).
The variant with the lowest P-value within each locus was considered the lead SNP
Poxy SNP:The protein-altering variants (PAVs) of CPQ genes that are in strong LD (r2>=0.8) with the lead SNP(the variant with lowest P value in LD-independent risk loci) . We define PAVs as variants predicted to be loss of function (pLOF) or missense variants based on VEP.

## Sheet: Supplementary Table 9
Supplementary Table 9 Results of similarity-based gene prioritization using Polygenic Priority Score (PoPS)
LD-independent risk locusa (chromosome:start to end)	Lead SNP	Ensembl ID	Gene symbol	PoPS Score	Rank	Feature1	Feature2	Feature3	Feature4	Feature5	Feature6	Feature7	Feature8	Feature9	Feature10
chr8:97924666-98112631	rs7817424	ENSG00000104324	CPQ	0.319694	1	mouse_multiple_projected_pcaloadings_clusters_Cluster33_PC_6	mouse_brain4_neurons_projected_pcaloadings_clusters_Cluster21_PC_2	human_brain_cerebellarhem_projected_pcaloadings_PC_99	mouse_adipocyte_projected_pcaloadings_clusters_Cluster2_PC_5	human_hippocampus_diffexprs_tstat_clusters_Cluster8	mouse_endothelium_projected_pcaloadings_clusters_Cluster18_PC_3	mouse_adipocyte_projected_pcaloadings_clusters_Cluster1_PC_3	mouse_development_average_expression_Cluster7	mouse_brain4_bnst_projected_pcaloadings_clusters_Cluster14_PC_7	mouse_multiple_projected_pcaloadings_clusters_Cluster24_PC_8
chr8:97924666-98112631	rs7817424	ENSG00000156466	GDF6	0.159483	2	mouse_development_diffexprs_genes_clusters_Cluster3	human_pancreasductal_projected_pcaloadings_PC_96	mouse_hairfollicle_projected_pcaloadings_clusters_Cluster17_PC_7	human_brain4_projected_pcaloadings_clusters_Cluster1_PC_10	human_multiple_projected_pcaloadings_clusters_Cluster29_PC_8	mouse_digestive_fetal_projected_pcaloadings_clusters_Cluster15_PC_3	GOBP_POSITIVE_REGULATION_OF_SIGNALING	human_embryo_projected_pcaloadings_PC_79	human_hippocampus_diffexprs_down_genes_clusters_Cluster5	human_multiple_projected_icaloadings_IC_60
chr8:97924666-98112631	rs7817424	ENSG00000180543	TSPYL5	0.052683	3	human_pancreas_projected_pcaloadings_PC_84	human_retina2_projected_pcaloadings_clusters_Cluster14_PC_4	human_retina2_projected_pcaloadings_clusters_Cluster1_PC_10	human_brain3_adult_projected_pcaloadings_clusters_Cluster16_PC_8	human_retina_projected_pcaloadings_PC_79	human_brain_cerebellarhem_projected_pcaloadings_PC_57	human_muscle_projected_pcaloadings_PC_83	mouse_muscle_projected_pcaloadings_clusters_Cluster19_PC_4	human_retina_projected_pcaloadings_clusters_Cluster3_PC_5	human_prostate_projected_pcaloadings_clusters_Cluster13_PC_6
chr8:97924666-98112631	rs7817424	ENSG00000156467	UQCRB	0.0331872	4	mouse_gastrulation_projected_pcaloadings_PC_86	mouse_gastrulation_projected_pcaloadings_PC_85	mouse_gastrulation_projected_pcaloadings_PC_76	human_brain_frontalcortex_diffexprs_genes_clusters_Cluster7	mouse_brain4_neurons_projected_pcaloadings_clusters_Cluster23_PC_5	human_airway_projected_pcaloadings_clusters_Cluster0_PC_3	human_pancreas_projected_pcaloadings_PC_84	mouse_vagina_projected_pcaloadings_clusters_Cluster7_PC_7	human_retina2_projected_pcaloadings_clusters_Cluster7_PC_5	human_gut_imm_projected_pcaloadings_clusters_Cluster11_PC_10
chr8:97924666-98112631	rs7817424	ENSG00000177459	ERICH5	0.00796507	5	mouse_adipocyte_projected_pcaloadings_PC_17	mouse_adipocyte_projected_pcaloadings_clusters_Cluster1_PC_3	human_gut_epi_projected_pcaloadings_clusters_Cluster25_PC_10	mouse_multiple2_bulk_projected_pcaloadings_PC_9	mouse_adipocyte_projected_pcaloadings_PC_64	human_fetalblood_projected_pcaloadings_clusters_Cluster18_PC_2	mouse_islets_projected_pcaloadings_PC_3	human_liver_diffexprs_tstat_clusters_Cluster14	human_brain3_adult_projected_pcaloadings_clusters_Cluster5_PC_4	mouse_immune_projected_pcaloadings_PC_52
chr8:97924666-98112631	rs7817424	ENSG00000156482	RPL30	-0.0139353	6	human_lymphnodes_projected_pcaloadings_clusters_Cluster1_PC_6	human_retina_projected_pcaloadings_PC_79	human_eye_projected_pcaloadings_clusters_Cluster8_PC_2	human_immune_projected_pcaloadings_clusters_Cluster44_PC_2	human_immune_projected_pcaloadings_clusters_Cluster37_PC_5	human_pancreas_projected_pcaloadings_PC_84	mouse_adipocyte_projected_pcaloadings_PC_41	human_tcell_projected_pcaloadings_clusters_Cluster10_PC_6	mouse_gastrulation_projected_pcaloadings_PC_16	human_pancreas_projected_pcaloadings_clusters_Cluster9_PC_3
chr8:97924666-98112631	rs7817424	ENSG00000156469	MTERF3	-0.081289	7	mouse_heart_ko_projected_pcaloadings_clusters_Cluster8_PC_3	mouse_kidney_projected_pcaloadings_clusters_Cluster17_PC_7	human_tcell_projected_pcaloadings_clusters_Cluster9_PC_8	human_muscle_projected_pcaloadings_PC_46	human_kidney3_projected_pcaloadings_PC_78	mouse_multiple_diffexprs_genes_clusters_Cluster17	human_multiple_projected_pcaloadings_PC_84	human_gut_fib_diffexprs_genes_clusters_Cluster16	human_prostate_projected_pcaloadings_clusters_Cluster1_PC_4	mouse_vagina_projected_pcaloadings_clusters_Cluster0_PC_4
chr8:97924666-98112631	rs7817424	ENSG00000156471	PTDSS1	-0.142407	8	HP_FEMORAL_HERNIA	HP_JOINT_HYPERFLEXIBILITY	HP_SYNDACTYLY	mouse_kidney_projected_pcaloadings_clusters_Cluster17_PC_7	mouse_multiple_projected_pcaloadings_clusters_Cluster1_PC_7	mouse_endothelium_projected_pcaloadings_clusters_Cluster25_PC_9	human_retina_projected_pcaloadings_clusters_Cluster3_PC_5	human_muscle_projected_pcaloadings_PC_83	human_monocytes_projected_pcaloadings_PC_98	mouse_endothelium_projected_pcaloadings_clusters_Cluster17_PC_9
chr8:97924666-98112631	rs7817424	ENSG00000169439	SDC2	-0.262119	9	ENSG00000182197	REACTOME_DEFECTIVE_EXT2_CAUSES_EXOSTOSES_2	ENSG00000113296	REACTOME_ATTACHMENT_AND_ENTRY	mouse_nerve_diffexprs_tstat_clusters_Cluster12	ENSG00000169231	human_lymphnodes_projected_icaloadings_IC_10	ENSG00000186340	mouse_endothelium_projected_pcaloadings_clusters_Cluster18_PC_3	mouse_digestive_adult_projected_pcaloadings_clusters_Cluster7_PC_7
chr8:97924666-98112631	rs7817424	ENSG00000147649	MTDH	-0.271999	10	ENSG00000111605	human_thymus_projected_pcaloadings_PC_47	human_gut_fib_projected_pcaloadings_clusters_Cluster16_PC_4	human_testis_projected_pcaloadings_clusters_Cluster4_PC_7	human_testis_projected_pcaloadings_clusters_Cluster4_PC_5	human_colon2_projected_pcaloadings_clusters_Cluster16_PC_2	human_pancreas_projected_pcaloadings_clusters_Cluster9_PC_6	mouse_heart_ko_projected_pcaloadings_clusters_Cluster1_PC_2	mouse_thymus_projected_pcaloadings_PC_56	human_muscle_projected_pcaloadings_clusters_Cluster2_PC_3
This table includes the genes located within 500 Kb of the identified risk loci. Additionally, for each gene, we provide the top 10 PoPS features that contribute to the PoPS score.

[truncated: 7 more sheets: Supplementary Table 10, Supplementary Table 11, Supplementary Table 12, Supplementary Table 13, Supplementary Table 14, Supplementary Table 15, Supplementary Table 16]
